# Supplementary material for: Multitrait genome-wide analyses identify new susceptibility loci and candidate drugs to primary sclerosing cholangitis
Source: PubMed Central journal article supplement (PMC9958016; doi:10.1038/s41467-023-36678-8), 2023-02-24

# **Multi-trait genome-wide joint analyses identify new susceptibility loci and candidate drugs to primary sclerosing cholangitis**

## **Supplementary Information**

Younghun Han<sup>#</sup>, Jinyoung Byun<sup>#</sup>, Catherine Zhu, Ryan Sun, Julia Y. Roh, Heather J. Cordell, Hyun-Sung Lee, Vikram R. Shaw, Sung Wook Kang, Javad Razjouyan, Matthew A. Cooley, Manal M. Hassan, Katherine A. Siminovitch, Trine Følseraas, David Ellinghaus, Annika Bergquist, Simon M Rushbrook, Andre Franke, Tom H Karlsen, Konstantinos N. Lazaridis, The International PSC Study Group<sup>‡</sup>, Katherine A. McGlynn, Lewis R. Roberts, Christopher I. Amos\*

<sup>#</sup>These authors contributed equally to this study.

<sup>‡</sup>The IPSCSG banner members and affiliations are listed in the Supplementary Information.

\*Correspondence to

Christopher I. Amos, Institute for Clinical and Translational Research, Baylor College of Medicine, One Baylor Plaza, Houston, Texas, 77030; Phone: 713-798-3394; FAX: 713-798-1499; email: [Chris.Amos@bcm.edu](mailto:Chris.Amos@bcm.edu)

## **GWAS summary statistics for PSC and other polygenic traits used in the present study.**

We downloaded publicly available GWAS summary statistics from existing data resources, the NHGRI-EBI GWAS Catalog<sup>1</sup>, the MR IEU OpenGWAS data<sup>2,3</sup>, and the international PSC Study Group<sup>4</sup>. PSC summary statistics can be downloaded from the international PSC Study Group (IPSCSG; <https://www.ipscsg.org/published-studies/>) and the NHGRI-EBI GWAS Catalog ([http://ftp.ebi.ac.uk/pub/databases/gwas/summary\\_statistics/GCST004001-GCST005000/GCST004030](http://ftp.ebi.ac.uk/pub/databases/gwas/summary_statistics/GCST004001-GCST005000/GCST004030)). The details, including data code, category of trait, sample size, number of SNPs, reference with PMID, and download link, are shown in Supplementary Data 1.

## **Estimates of genetic heritability and pairwise genetic correlation using LDSR analysis.**

We implemented LD score regression (LDSR; `ldsc` v1.0.1, <https://github.com/bulik/ldsc>)<sup>5,6</sup> to estimate genome-wide SNP-array heritability ( $h^2$ ) representing the proportion of phenotypic variance explained by all common SNPs and to examine the shared genetic contribution ( $rg$ ) of PSC against numerous polygenic traits using publicly available GWAS summary statistics and linkage disequilibrium (LD) information with European samples from 1000 Genome Project as a reference for the pattern of genome-wide LD. LDSR is a method regressing  $\chi^2$  statistics from summary statistics on LD scores, estimating genetic correlation without bias due to population stratification or cryptic relatedness<sup>5,6</sup>. By regressing SNP-level associations for two traits, (i.e., the product of Z scores,  $Z_{PSC} \times Z_{trait1}$ ) and weighting each SNP by its LD score, which is an estimate of the total amount of genetic variations tagged by each variant, we can estimate the magnitude and direction of the shared genomic architecture between PSC and a tested trait. We first implemented the command option of LD Score with “`munge_sumstats.py`” to generate the “.sumstats” format from the summary statistics after selecting approximately 1.22M HapMap3 SNPs with minor allele frequency (MAF) > 0.01 and exclusion of multi-allelic SNPs and the major histocompatibility complex (MHC) region (Chr6:25Mb-34Mb) as recommended. The major histocompatibility complex (MHC) region was excluded from summary statistics because of the complex and extended LD pattern and genetic architecture of the MHC region<sup>7-10</sup>. We then applied “`ldsc.py --rg PSC.sumstats.gz, trait1.sumstats.gz --ref-ld-chr eur_w_ld_chr/ --w-ld-chr eur_w_ld_chr/ --out PSC_trait1`”.

## **Joint association analysis of multi-traits on PSC.**

We carried out MTAG<sup>11</sup> (`mtag` v1.0.8; <https://github.com/JonJala/mtag>) to discover new independent PSC risk-associated loci against polygenic traits that demonstrated strong genetic correlation with PSC through LDSR analysis. MTAG<sup>11</sup> estimates the effect size per SNP for each trait by incorporating information included in other correlated traits by utilizing

bivariate LD score regression to gauge sample overlaps between summary statistics from multiple GWAS as input in MTAG (since MTAG does not require summary statistics from independent samples<sup>11</sup> among the multiple GWAS). It then carries out a combined LD score regression and meta-analysis approach from the genetically related traits. MTAG aligned all alleles in all summary statistics analyzed, and SNPs not present in any summary statistics were removed further. The output from MTAG provides re-estimated effect size and P-value (P) per each SNP for each trait.

### **Summary statistics imputation.**

Since MTAG utilizes a common set of SNPs that overlap among all tested traits, MTAG implementation with high-powered GWAS is recommended<sup>11</sup>. The number of SNPs for PBC is approximately 5M, and those for other immune-mediated disorders are approximately ~8M (PSC and lupus) and ~10M (IBD, CD, and UC). We imputed the GWAS summary statistics for PBC<sup>12</sup> using SSimp package<sup>13</sup> (ssimp v.0.5.6; [https://github.com/zkotalik/ssimp\\_software](https://github.com/zkotalik/ssimp_software)) and European individuals from the 1000 Genomes Project phase 3 reference panel, filtering out SNPs with a MAF  $\leq 0.005$ . This imputation increased the number of SNPs from 5,054,572 to 8,412,578 for subsequent analyses, such as LDSR and MTAG, after removing SNPs with poor imputation quality ( $r^2 < 0.5$ ). We applied “ssimp --gwas in.chr22 \ --ref

```
~/reference_panels/1000genomes/ALL.chr22.phase3_shapeit2_mvncall_integrated_v5a.20130502.genotypes.vcf.gz \
--sample.names
```

```
~/reference_panels/1000genomes/integrated_call_samples_v3.20130502.ALL.panel/sample/super_pop=EUR
```

```
--imputed.maf 0.005 --impute.range 22 --out out.chr22 “ in SSimp as an example for chromosome 22 (as an example script for chromosome 22).
```

### **Colocalization between GWAS and Expression quantitative trait locus signals from the Genotype-Tissue Expression**

Based on the prediction that risk variants may exert their effects via various tissues, we surveyed all 49 tissue types available in Genotype-Tissue Expression (GTEx)<sup>14</sup> v8. The sample size of each tissue is described in Supplementary Data 3. All variant-gene cis-expression quantitative trait locus (eQTL) associations tested in each tissue within  $\pm 100$ kb windows of the lead variant presented in MTAG\_PSC were extracted. Colocalization of the MTAG\_PSC and eQTL signals was calculated using the LD-independent colocalization approach (coloc v5.1.0; <https://cran.r-project.org/web/packages/coloc/>)<sup>15</sup>. Although the PSC GWAS<sup>4</sup> implemented population stratification analysis and focused on European-descent individuals, we applied the LD-independent approach to avoid spurious colocalizations due to the violation of common LD assumption

in the GWAS summary-level data. We considered the colocalizations when coloc suggested the plausible posterior probability that both PSC and a tissue from GTEx v8 are associated and share a single function variant ( $PP4 > 0.80$ ).

### **Gene-based functional enrichment analysis using STRING database and DAVID Bioinformatics Resources**

We carried out gene-based enrichment analysis of protein-protein interaction (PPI) networks amongst 406 potential candidate genes from position mapping, eQTL mapping, and chromatin interaction mapping as well as newly 19 MTAG-identified and previously reported PSC risk-associated genes using STRING PPI networks (STRING v11.5; <https://string-db.org/cgi/input?sessionId=bmwWOuutn8ZR>). We selected the setting options with the max number of interactions = 20 and the highest confidence score of 0.9 to survey the functional enrichment of numerous pathways by genes. We also utilized the Database for Annotation, Visualization, and Integrated Discovery (DAVID v6.8; <https://david.ncifcrf.gov/>) Bioinformatics Resources to survey the enrichment of various functional annotations (count > 2, P-value < 0.05).

### **Network-based proximity between drugs and disease-identified proteins for drug repurposing**

To estimate a drug-disease proximity measures, distance ( $d$ ) and the corresponding relative proximity ( $z$ ), we implemented network-based proximity analysis for drug repurposing developed by Guney et al.<sup>16</sup>. The method provides a relative measure that quantifies the network-based proximity (or closeness) between drugs and disease proteins encoded by genes associated with disease<sup>12,16</sup>. We obtained the drug and drug target data from the DrugBank database<sup>17</sup> (version 5.1.9, <https://go.drugbank.com/releases/latest>, accessed in April 2022). In this study, we selected 39 PSC-associated genes from previously reported genome-wide significant associations<sup>18</sup> and newly MTAG-identified associations at  $P=5.00 \times 10^{-8}$  (Supplementary Data 16). Among them, 32 candidate genes were converted to NCBI gene IDs using Ensembl BioMart<sup>19</sup> and used to calculate the relative proximity between each drug in the DrugBank database (v5.1.9) and a set of candidate proteins for PSC (Supplementary Table 1). All required packages are available at the emreg00 GitHub repository (<https://github.com/emreg00>)<sup>16</sup>.

### **Supplementary References**

1. Buniello A, MacArthur JAL, Cerezo M, Harris LW, Hayhurst J, Malangone C, et al. The NHGRI-EBI GWAS Catalog of published genome-wide association studies, targeted arrays and summary statistics 2019. *Nucleic Acids Res.* 2019;47(D1):D1005-d12.
2. Elsworth B, Lyon M, Alexander T, Liu Y, Matthews P, Hallett J, et al. The MRC IEU OpenGWAS data infrastructure. *bioRxiv.* 2020:2020.08.10.244293.
3. Lyon M, Andrews SJ, Elsworth B, Gaunt TR, Hemani G, Marcora E. The variant call format provides efficient and robust storage of GWAS summary statistics. *bioRxiv.* 2020:2020.05.29.115824.
4. Ji SG, Juran BD, Mucha S, Folseraas T, Jostins L, Melum E, et al. Genome-wide association study of primary sclerosing cholangitis identifies new risk loci and quantifies the genetic relationship with inflammatory bowel disease. *Nat Genet.* 2017;49(2):269-73.

5. Bulik-Sullivan B, Finucane HK, Anttila V, Gusev A, Day FR, Loh PR, et al. An atlas of genetic correlations across human diseases and traits. *Nat Genet.* 2015;47(11):1236-41.
6. Bulik-Sullivan BK, Loh PR, Finucane HK, Ripke S, Yang J, Schizophrenia Working Group of the Psychiatric Genomics C, et al. LD Score regression distinguishes confounding from polygenicity in genome-wide association studies. *Nat Genet.* 2015;47(3):291-5.
7. Byun J, Han Y, Ostrom QT, Edelson J, Walsh KM, Pettit RW, et al. The Shared Genetic Architectures Between Lung Cancer and Multiple Polygenic Phenotypes in Genome-Wide Association Studies. *Cancer Epidemiol Biomarkers Prev.* 2021;30(6):1156-64.
8. Pettit RW, Byun J, Han Y, Ostrom QT, Edelson J, Walsh KM, et al. The shared genetic architecture between epidemiological and behavioral traits with lung cancer. *Sci Rep.* 2021;11(1):17559.
9. Ostrom QT, Edelson J, Byun J, Han Y, Kinnersley B, Melin B, et al. Partitioned glioma heritability shows subtype-specific enrichment in immune cells. *Neuro Oncol.* 2021.
10. Byun J, Han Y, Walsh KM, Park AS, Bondy ML, Amos CI. Shared genomic architecture between COVID-19 severity and numerous clinical and physiologic parameters revealed by LD score regression analysis. *Sci Rep.* 2022;12(1):1891.
11. Turley P, Walters RK, Maghzian O, Okbay A, Lee JJ, Fontana MA, et al. Multi-trait analysis of genome-wide association summary statistics using MTAG. *Nat Genet.* 2018;50(2):229-37.
12. Cordell HJ, Fryett JJ, Ueno K, Darlay R, Aiba Y, Hitomi Y, et al. An international genome-wide meta-analysis of primary biliary cholangitis: Novel risk loci and candidate drugs. *J Hepatol.* 2021;75(3):572-81.
13. Rueger S, McDaid A, Kutalik Z. Evaluation and application of summary statistic imputation to discover new height-associated loci. *PLoS Genet.* 2018;14(5):e1007371.
14. Consortium G. The Genotype-Tissue Expression (GTEx) project. *Nat Genet.* 2013;45(6):580-5.
15. Wallace C. Eliciting priors and relaxing the single causal variant assumption in colocalisation analyses. *PLoS Genet.* 2020;16(4):e1008720.
16. Guney E, Menche J, Vidal M, Barabasi AL. Network-based in silico drug efficacy screening. *Nat Commun.* 2016;7:10331.
17. Wishart DS, Feunang YD, Guo AC, Lo EJ, Marcu A, Grant JR, et al. DrugBank 5.0: a major update to the DrugBank database for 2018. *Nucleic Acids Res.* 2018;46(D1):D1074-D82.
18. MacArthur J, Bowler E, Cerezo M, Gil L, Hall P, Hastings E, et al. The new NHGRI-EBI Catalog of published genome-wide association studies (GWAS Catalog). *Nucleic Acids Res.* 2017;45(D1):D896-D901.
19. Cunningham F, Allen JE, Allen J, Alvarez-Jarreta J, Amode MR, Armean IM, et al. Ensembl 2022. *Nucleic Acids Res.* 2022;50(D1):D988-D95.

## **A full list of members of the International PSC Study Group (IPSCSG) banner.**

Christoph Schramm<sup>24</sup>, David Shapiro<sup>25</sup>, Elizabeth Goode<sup>26</sup>, Kelly Spiess<sup>26</sup>, Brijesh Srivastava<sup>26</sup>, George Mells<sup>26</sup>, Richard N Sandford<sup>26</sup>, Olivier Chazouillères<sup>27</sup>, Sven Almer<sup>28</sup>, Pietro Invernizzi<sup>29</sup>, Ana Lleo<sup>29</sup>, Marco Carbone<sup>29</sup>, Erik M Schlicht<sup>30</sup>, Aliya F Gulamhusein<sup>30</sup>, Brian D Juran<sup>30</sup>, John E Eaton<sup>30</sup>, Hugh E. Mulcahy<sup>31</sup>, David H. Adams<sup>32</sup>, Gideon M Hirschfield<sup>32</sup>, Alexander Knuth<sup>33</sup>, Mattias Laudes<sup>34</sup>, Alastair Burt<sup>35</sup>, Gregory Gores<sup>36</sup>, Severine Vermeire<sup>37</sup>, Ulrich Beuers<sup>38</sup>, Henk R. van Buuren<sup>39</sup>, Andrzej Habior<sup>40</sup>, Andreas E. Kremer<sup>38</sup>, Rinse K Weersma<sup>41</sup>, Hiromasa Ohira<sup>42</sup>, Shahid A Khan<sup>43</sup>, Tim Lankisch<sup>44</sup>, Michael P Manns<sup>44</sup>, Tobias J Weismüller<sup>44</sup>, Marco Marzioni<sup>45</sup>, George Webster<sup>46</sup>, Beate K. Straub<sup>47</sup>, Peter Schirmacher<sup>47</sup>, Felix Braun<sup>48</sup>, Cisca Wijmenga<sup>49</sup>, Martina Sterneck<sup>50</sup>, Beat Müllhaup<sup>51</sup>, Chantal Housset<sup>52</sup>, Emina Halilbasic<sup>53</sup>, Michael Trauner<sup>53</sup>, Peter Sauer<sup>54</sup>, Mario Strazzabosco<sup>55</sup>, Einar Björnsson<sup>56</sup>, Dieter Häussinger<sup>57</sup>, Verena Keitel<sup>57</sup>, Tobias Müller<sup>58</sup>, Werner Van Steenberghe<sup>59</sup>, Christian Rust<sup>60</sup>, Andreas Teufel<sup>61</sup>, Graeme Alexander<sup>62</sup>, Joseph A Odin<sup>63</sup>, Simon D. Taylor-Robinson<sup>64</sup>, Atsushi Tanaka<sup>65</sup>, Daniel N Gotthardt<sup>66</sup>, Kimmo Kontula<sup>67</sup>, Hanns-Ulrich Marshall<sup>68</sup>, Saul J. Karpen<sup>69</sup>, Luca Fabris<sup>70</sup>, Annarosa Floreani<sup>71</sup>, Roger W Chapman<sup>72</sup>, Carlo Selmi<sup>73</sup>, Fredrik Rorsman<sup>74</sup>, Elizabeth J Atkinson<sup>75</sup>, Mariza de Andrade<sup>75</sup>, Peter Fickert<sup>76</sup>, Keith Lindor<sup>77</sup>, Andreas Geier<sup>78</sup>, David Goldberg<sup>79</sup>, Jayant Talwalkar<sup>79</sup>, Yoshiyuki Ueno<sup>80</sup>, Kapil B Chopra<sup>81</sup>, Christopher L Bowlus<sup>82</sup>, Lina Lindstrøm<sup>83</sup>, Niklas Björkström<sup>83</sup>, Velimir A Luketic<sup>84</sup>, Kate Williamson<sup>85</sup>, Cleo van Diemen<sup>86</sup>, Pieter van der Vlies<sup>86</sup>, Martti Farkkila<sup>87</sup>, Ansgar Lohse<sup>88</sup>, Naga Chalasani<sup>89</sup>, David Jones<sup>90</sup>, Stefan Schreiber<sup>17</sup>, Sören Mucha<sup>17</sup>, Eva Ellinghaus<sup>17</sup>, Gunnar Jacobs<sup>91</sup>, Wolfgang Lieb<sup>91</sup>, Jennifer Sambrook<sup>92</sup>, Johan Fevery<sup>93</sup>, Schalk Van der Merwe<sup>93</sup>, Piotr Milkiewicz<sup>94</sup>, Kris V Kowdley<sup>95</sup>, Catalina Coltescu<sup>96</sup>, Albert Pares<sup>97</sup>, Ewa Wunsch<sup>98</sup>, Ruben Plentz<sup>99</sup>, Dennis Black<sup>100</sup>, Carmel Moore<sup>101</sup>, David J Roberts<sup>101</sup>, John Danesh<sup>101</sup>, Willem H Ouwehand<sup>101</sup>, Espen Melum<sup>16</sup>, Kirsten M Boberg<sup>16</sup>, Lars Aabakken<sup>16</sup>, Peter R Durie<sup>102</sup>, Arthur Kaser<sup>103</sup>, Christophe Corpechot<sup>104</sup>, Raoul Poupon<sup>104</sup>, Andrew Burroughs<sup>105</sup>, Bertus Eksteen<sup>106</sup>, Stephen Pereira<sup>107</sup>, Daniel Burger<sup>108</sup>, Frank G. Schaap<sup>109</sup>, Serge Zweers<sup>109</sup>, Hugh Harley<sup>110</sup>, Luke Jostins<sup>111</sup>, Daniel J Gaffney<sup>112</sup>, Carl A Anderson<sup>112</sup>, Javier Gutierrez-Achury<sup>112</sup>, Jimmy Z Liu<sup>112</sup>, Natsuhiko Kumasaka<sup>112</sup>, Sun-Gou Ji<sup>112</sup>, Tejas Shah<sup>112</sup>, Trine Folseraas<sup>16</sup>, David Ellinghaus<sup>17</sup>, Annika Bergquist<sup>18</sup>, Simon M Rushbrook<sup>19,20</sup>, Andre Franke<sup>17</sup>, Tom H Karlsen<sup>21</sup>, Konstantinos N. Lazaridis<sup>22</sup>

## **Affiliations of the IPSCSG banner authors**

24. 1st Department of Medicine, University Medical Center Hamburg-Eppendorf, Hamburg, Germany.
25. 4350 La Jolla Village Drive Suite 960, San Diego, CA 92122, USA.
26. Academic Department of Medical Genetics, University of Cambridge, Cambridge, UK.
27. AP-HP Hôpital Saint Antoine, Department of Hepatology, UPMC University Paris 6, Paris, France.
28. Avd. för Gastroenterologi och Hepatologi, Institutionen för Klinisk och Experimentell Medicin (IKE), The University Hospital, Linköping, Sweden.
29. Center for Autoimmune Liver Diseases, Humanitas Clinical and Research Center, Rozzano, Milan, Italy.
30. Center for Basic Research in Digestive Diseases, Division of Gastroenterology and Hepatology, Mayo Clinic College of Medicine, Rochester, Minnesota, USA.
31. Centre for Colorectal Diseases, St Vincent's University Hospital, Dublin, Ireland.
32. Centre for Liver Research, MRC Centre for Immune Regulation, Institute for Biomedical Research, University of Birmingham, Birmingham, B15 2TT, UK.
33. Clinic and Policlinic for Oncologie, University Hospital Zürich, Zürich, Switzerland.
34. Clinic of Internal Medicine I, University Hospital Schleswig-Holstein, Kiel, Germany.
35. Clinical Deanery, Faculty of Medical Sciences, Newcastle University, Newcastle, UK.
36. College of Medicine, Mayo Clinic, Rochester, MN, USA.
37. Department of Clinical and Experimental Medicine, Katholieke Universiteit Leuven, Leuven, Belgium.
38. Department of Gastroenterology and Hepatology, Academic Medical Center, University of Amsterdam, Amsterdam, the Netherlands.
39. Department of Gastroenterology and Hepatology, Erasmus University Medical Centre, Rotterdam, The Netherlands.
40. Department of Gastroenterology, Hepatology and Clinical Oncology Centre of Postgraduate Medical Education, Warsaw, Poland.
41. Department of Gastroenterology and Hepatology, University of Groningen, University Medical Centre Groningen, Groningen, the Netherlands.
42. Department of Gastroenterology and Rheumatology, Fukushima Medical University School of Medicine, Fukushima, Japan.

43. Department of Gastroenterology, Hammersmith Hospital Campus, London, UK.
44. Department of Gastroenterology, Hepatology and Endocrinology, Hannover Medical School, Hannover, Germany.
45. Department of Gastroenterology, Università Politecnica delle Marche, Ospedali Riuniti University Hospital, Ancona, Italy.
46. Department of Gastroenterology, University College Hospital, London, UK.
47. Department of General Pathology, Institute of Pathology, Heidelberg, Germany.
48. Department of General, Visceral, Thoracic, Transplantation and Pediatric Surgery, University Medical Centre Schleswig-Holstein, Campus Kiel, Kiel, Germany.
49. Department of Genetics, University of Groningen, University Medical Centre Groningen, Groningen, the Netherlands.
50. Department of Hepatobiliary Surgery and Transplantation, University Medical Center Hamburg-Eppendorf, Hamburg, Germany.
51. Department of Hepatology and Gastroenterology, Swiss Hepato-Pancreatico-Biliary (HPB) and Transplant Center, University Hospital Zurich, Zurich, Switzerland.
52. Department of Hepatology, Reference Center for Inflammatory Biliary Diseases and Autoimmune Hepatitis (CRM R MIVB-H, ERN RARE-LIVER), Assistance Publique-Hôpitaux de Paris (AP-HP), Saint-Antoine Hospital, Paris, France.
53. Department of Internal Medicine III, Division of Gastroenterology and Hepatology Medical University of Vienna Waehringer, Vienna, Austria.
54. Department of Internal Medicine IV, University Hospital of Heidelberg, Heidelberg, Germany.
55. Department of Internal Medicine Section of Digestive Diseases Yale University, New Haven, CT, USA.
56. Department of Internal Medicine, Division of Gastroenterology and Hepatology, Landspítali University Hospital, Reykjavik, Iceland.
57. Department of Internal Medicine, Gastroenterology, Hepatology and Infectiology, Heinrich Heine Universität, Düsseldorf, Germany.
58. Department of Internal Medicine, Hepatology and Gastroenterology, Charité Universitätsmedizin Berlin, Berlin, Germany.
59. Department of Liver, Biliary and Pancreatic Diseases, University Hospital Gasthuisberg, Catholic University of Leuven, Leuven, Belgium.
60. Department of Medicine 2, Grosshadern, University of Munich, Munich, Germany.
61. Department of Medicine I, University Medical Center, Regensburg, Germany.
62. Department of Medicine, Division of Hepatology, University of Cambridge, Cambridge.
63. Department of Medicine, Mount Sinai School of Medicine, New York, New York, USA.
64. Department of Medicine, St Mary's Hospital Campus, Imperial College London, UK.
65. Department of Medicine, Teikyo University School of Medicine, Tokyo, Japan.
66. Department of Medicine, University Hospital of Heidelberg, Heidelberg, Germany.
67. Department of Medicine, University of Helsinki, Helsinki, Finland.
68. Department of Molecular and Clinical Medicine, Institute of Medicine, Sahlgrenska Academy, University of Gothenburg, Gothenburg, Sweden.
69. Department of Pediatrics, Baylor College of Medicine, Houston, Texas, USA.
70. Department of Surgical and Gastroenterological Sciences, University of Padua, Padua, Italy.
71. Department of Surgical, Oncological and Gastroenterological Sciences, University of Padova, Padova, Italy.
72. Department of Translational Gastroenterology, Oxford University Hospitals NHS Trust, Oxford, UK.
73. Department of Translational Medicine, University of Milan, IRCCS Istituto Clinico Humanitas, Milan, Italy.
74. Department of Gastroenterology and Hepatology, Uppsala University Hospital, Uppsala, Sweden.
75. Division of Biomedical Statistics and Informatics, Mayo Clinic, Rochester, Minnesota, USA.
76. Division of Gastroenterology and Hepatology, Dept. of Medicine, Medical University of Graz, Graz, Austria.
77. Division of Gastroenterology and Hepatology, Mayo Clinic, Rochester, MN, USA.
78. Division of Gastroenterology and Hepatology, University Hospital Zürich, Zürich, Switzerland.
79. Division of gastroenterology, Dept. of Medicine, Hospital of the University of Pennsylvania and Perelman Center for Advanced Medicine, USA.
80. Division of Gastroenterology, Graduate School of Medicine, Tohoku University, Sendai, Japan.
81. Division of Gastroenterology, Hepatology and Nutrition, University of Pittsburgh, Pittsburgh, Pennsylvania, USA.
82. Division of Gastroenterology and Hepatology, University of California at Davis, Davis, California, USA.
83. Gastrocentrum Medicin, Karolinska Univ, Stockholm, Sweden.
84. Gastroenterology and Hepatology Section, Virginia Commonwealth University, Richmond, Virginia, USA.

85. Gastroenterology Department, John Radcliffe Hospital, Oxford University Hospitals, Oxford, UK.
86. Genome Analysis Facility, Dept. of Genetics, University Medical Centre Groningen, Groningen, The Netherlands.
87. Helsinki University and Helsinki University Hospital, Clinic of Gastroenterology, Helsinki, Finland.
88. I. Medizinische Klinik und Poliklinik, Universitätsklinikum Hamburg-Eppendorf, Hamburg, Germany.
89. Indiana University School of Medicine, Indianapolis, Indiana, USA.
90. Institute of Cellular Medicine (Hepatology), The Medical School, Newcastle University, Newcastle upon Tyne, UK.
91. Institute of Epidemiology and Biobank PopGen, University Hospital Schleswig-Holstein, Kiel, Germany.
92. INTERVAL Coordinating Centre, Department of Public Health and Primary Care, University of Cambridge, Cambridge, UK.
93. Laboratory of Hepatology, University Hospital Gasthuisberg, Leuven, Belgium.
94. Liver and Internal Medicine Unit, Department of General, Transplant and Liver Surgery, Medical University of Warsaw, Warsaw, Poland.
95. Liver Care Network and Organ Care Research, Swedish Medical Center, Seattle, Washington, USA.
96. Liver Centre, Toronto Western Hospital, Toronto, Ontario, Canada.
97. Liver Unit, Hospital Clínic, IDIBAPS, CIBERehd, University of Barcelona, Barcelona, Spain.
98. Liver Unit, Pomeranian Medical University, Szczecin, Poland.
99. Medizinische Universitätsklinik, Abteilung Innere Medizin 1, Tübingen, Germany.
100. Memphis Medical Center, Memphis, Tennessee, USA.
101. NIHR Blood and Transplant Research Unit in Donor Health and Genomics, Department of Public Health and Primary Care, University of Cambridge, Cambridge, UK.
102. Physiology and Experimental Medicine, Research Institute, Hospital for Sick Children, Toronto, Ontario, Canada.
103. Section of Gastroenterology and Hepatology Medical Department, Addenbrooke's Hospital, Cambridge, UK.
104. Service d'Hépatologie, Centre de référence des Maladies Inflammatoires des Voies Biliaires, Hôpital Saint-Antoine and UMR\_S938, Faculté de Médecine Saint-Antoine, Université Pierre et Marie Curie (UPMC), Paris, France.
105. Sheila Sherlock Liver Centre and Department of Surgery, Royal Free Hospital, London, UK.
106. Snyder Institute for Chronic Diseases, Department of Medicine, University of Calgary, Calgary, Alberta, Canada.
107. The UCL Institute of Hepatology, Royal Free Hospital, London, UK.
108. Translational Gastroenterology Unit, John Radcliffe Hospital, Oxford Radcliffe NHS Trust, Oxford, UK.
109. Tytgat Institute for Liver and Intestinal research, Academic Medical Center, Amsterdam, The Netherlands.
110. University of Adelaide, Head of Clinical Hepatology, Co-Director of Viral Hepatitis Centre, Royal Adelaide Hospital, Australia.
111. Wellcome Trust Centre for Human Genetics, University of Oxford, Oxford, UK.
112. Wellcome Trust Sanger Institute, Wellcome Trust Genome Campus, Hinxton, UK.



**Supplementary Table 1. PSC risk-associated candidate protein input for drug repurposing analysis.** Candidate proteins were selected based on a genome-wide significant P-value shown in Supplementary Data 16.

| Gene stable ID version | Gene name | NCBI gene ID | Gene stable ID version | Gene name | NCBI gene ID |
|------------------------|-----------|--------------|------------------------|-----------|--------------|
| ENSG00000178562.13     | CD28      | 940          | ENSG00000038532.10     | CLEC16A   | 23274        |
| ENSG00000178623.7      | GPR35     | 2859         | ENSG00000105287.8      | PRKD2     | 25865        |
| ENSG00000109471.4      | IL2       | 3558         | ENSG00000114861.14     | FOXP1     | 27086        |
| ENSG00000134460.11     | IL2RA     | 3559         | ENSG00000198218.6      | QRICH1    | 54870        |
| ENSG00000068383.14     | INPP5A    | 3632         | ENSG00000061273.13     | HDAC7     | 51564        |
| ENSG00000128604.14     | IRF5      | 3663         | ENSG00000160185.9      | UBASH3A   | 53347        |
| ENSG00000109323.4      | MANBA     | 4126         | ENSG00000138684.3      | IL21      | 59067        |
| ENSG00000173531.11     | MST1      | 4485         | ENSG00000112182.10     | BACH2     | 60468        |
| ENSG00000204842.10     | ATXN2     | 6311         | ENSG00000142606.11     | MMEL1     | 79258        |
| ENSG00000196628.9      | TCF4      | 6925         | ENSG00000103047.3      | TANGO6    | 79613        |
| ENSG00000118503.10     | TNFAIP3   | 7128         | ENSG00000124780.9      | KCNK17    | 89822        |
| ENSG00000183527.7      | PSMG1     | 8624         | ENSG00000167037.14     | SGSM1     | 129049       |
| ENSG00000153094.17     | BCL2L11   | 10018        | ENSG00000162927.9      | PUS10     | 150962       |
| ENSG00000111252.6      | SH2B3     | 10019        | ENSG00000119919.9      | NKX2-3    | 159296       |
| ENSG00000150637.4      | CD226     | 10666        | ENSG00000168071.17     | CCDC88B   | 283234       |
| ENSG00000170145.4      | SIK2      | 23235        | ENSG00000266760.1      | MIR4464   | 100616109    |

**Supplementary Figure 1. LocusZoom plots of regional genome-wide associations for MTAG-identified PSC-specific new susceptibility associations.** LocusZoom genomic regional plot displays a new PSC-specific risk locus identified from the multi-trait analysis of GWAS (MTAG) in the discovery study. All presented P-values (p-value) are two-sided unadjusted P-values. The newly MTAG-identified PSC risk variant is colored in purple, and colors dots indicate LD measure  $r^2$  with the lead variant in purple. **(a) - (g)** displays newly discovered loci in this study and **(h)** new lead variant in the previously reported locus. **(a)** rs7608697 in *PUS10* on 2p16.1; **(b)** rs228614 in *MANBA* on 4q24; **(c)** rs12198665 in *KCNK17* on 6p21.2; **(d)** rs17780429 in *TNFAIP3* on 6q23.3; **(e)** rs3757387 in *IRF5* on 7q32.1; **(f)** rs791168 in *NKX2-3* on 10q24.2; **(g)** rs79390277 in *TANGO6* on 16q22.1; **(h)** rs6787808 in *QRICHI* on 3p21.31. LocusZoom (v1.4; <https://github.com/statgen/locuszoom-standalone>) was used to visualize regional GWAS results.

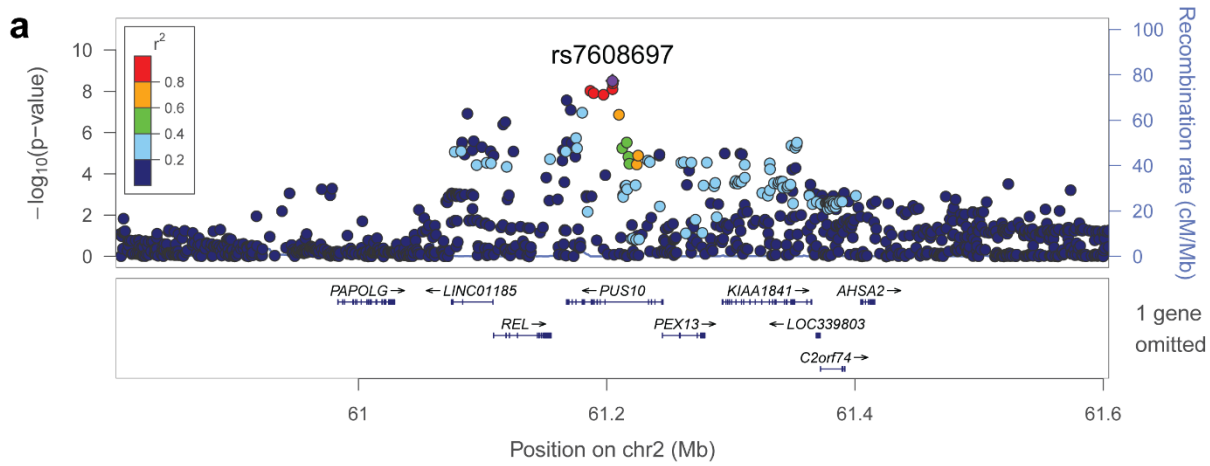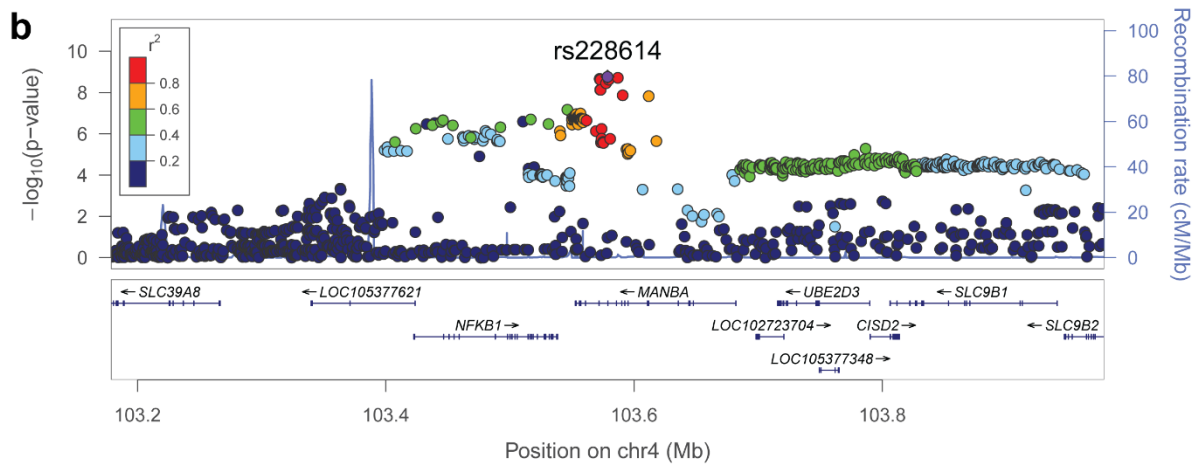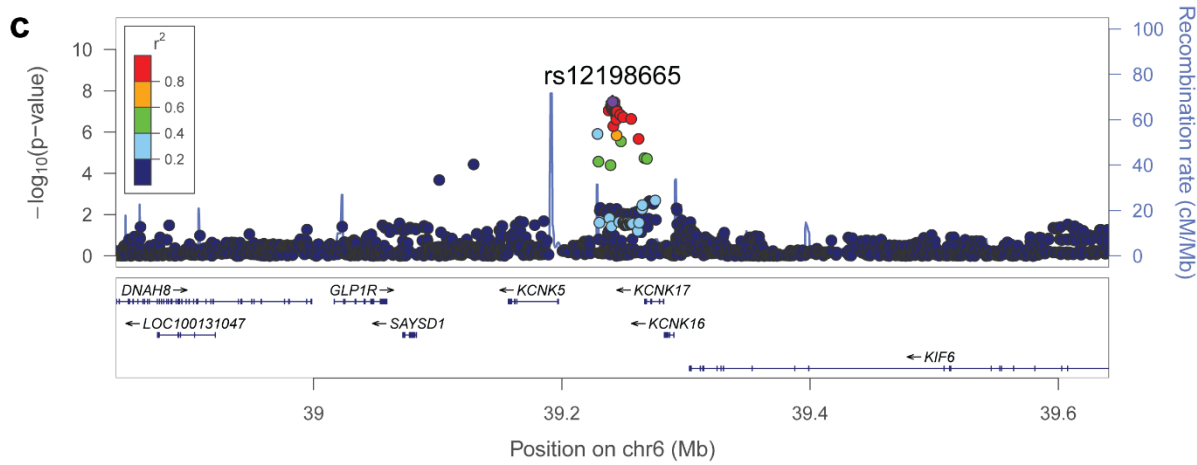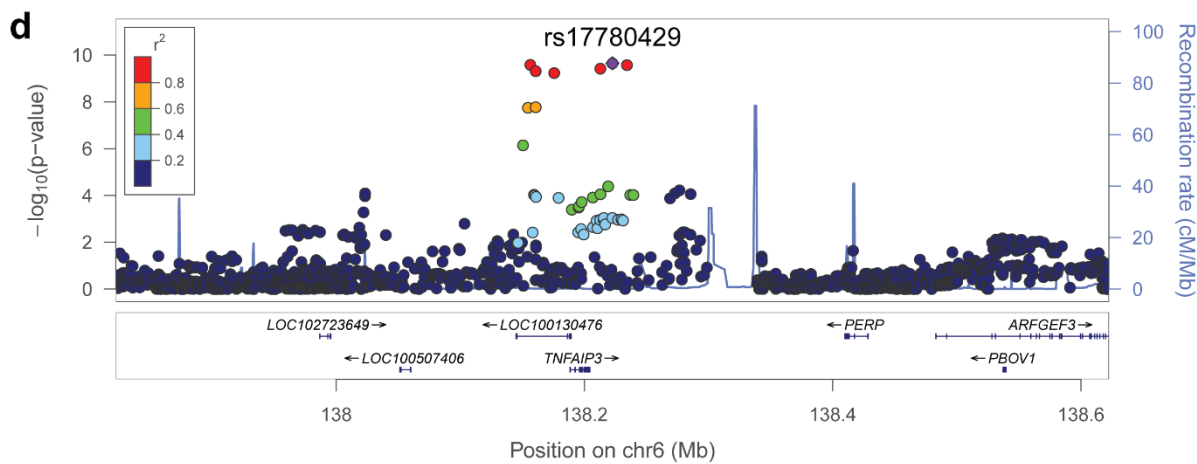

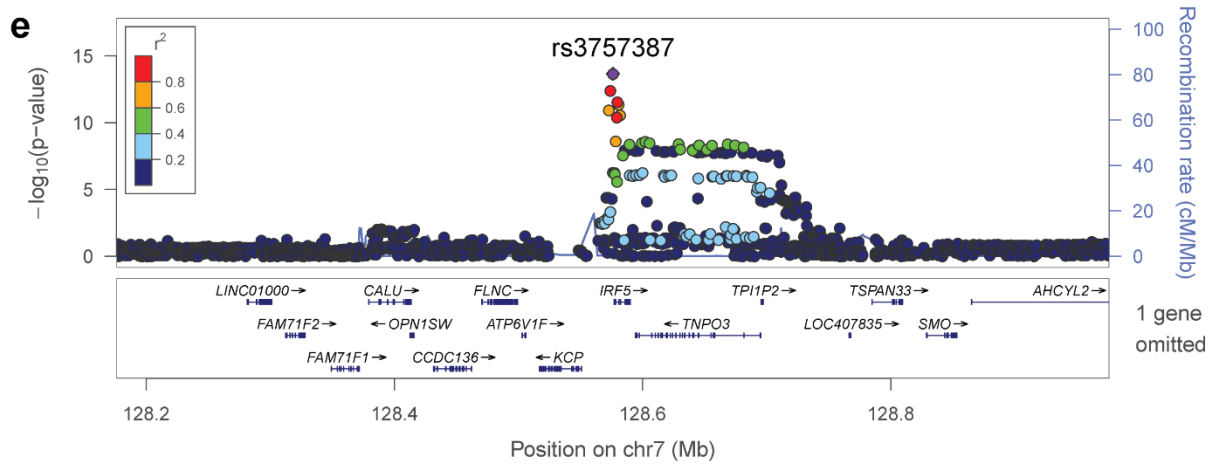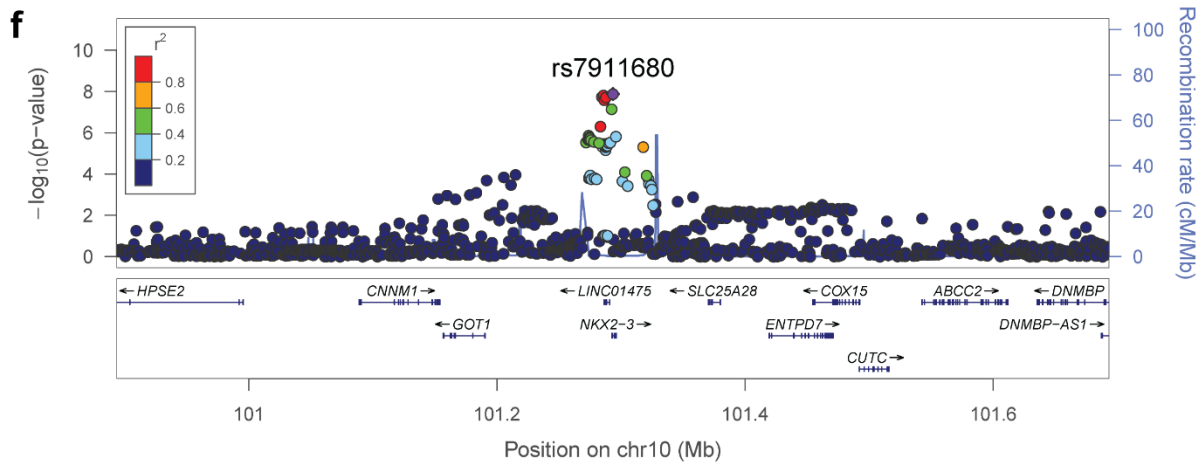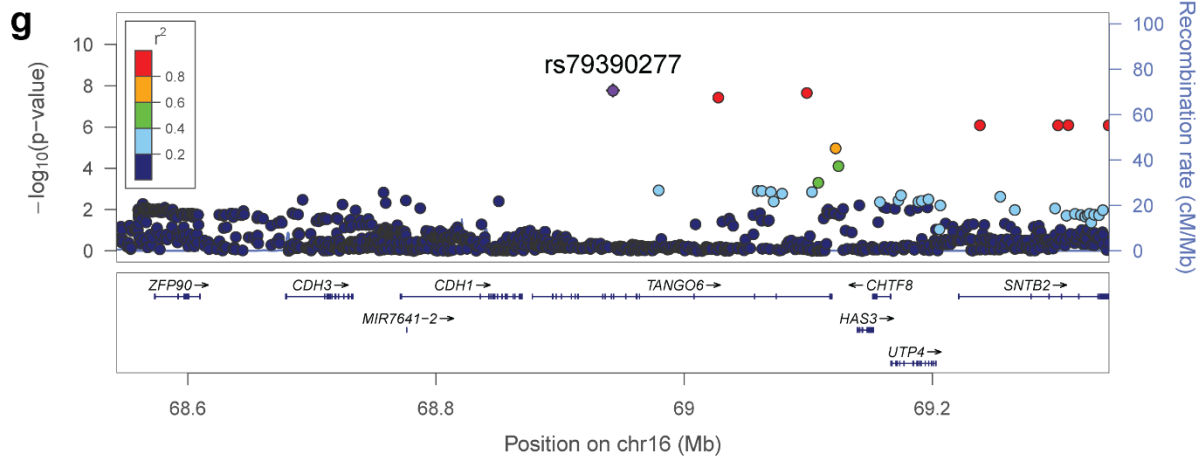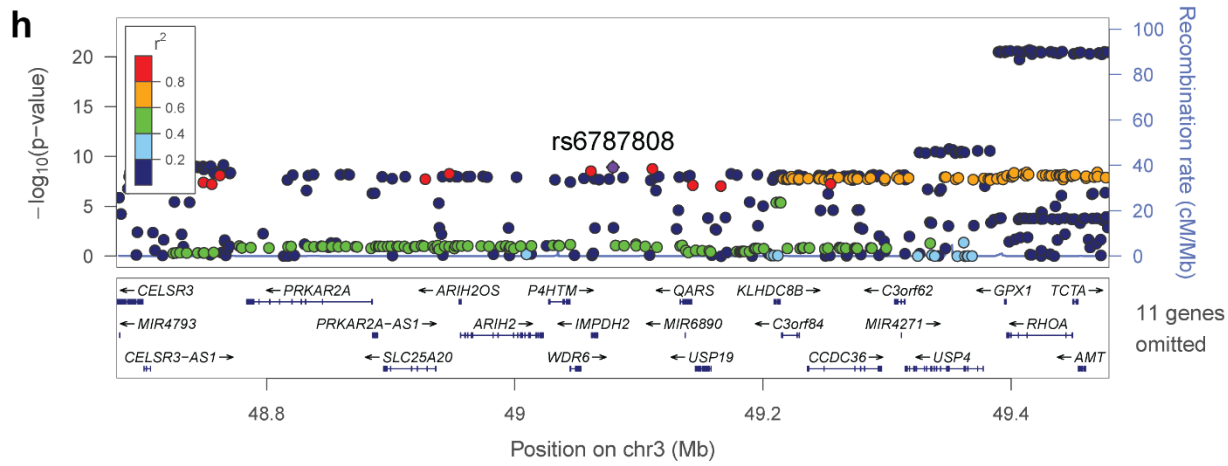

**Supplementary Figure 2. Manhattan and quantile-quantile plots from PSC-specific genome-wide associations.** The solid lines in red and the dotted lines in blue indicate the genome-wide significant two-sided unadjusted P-value of  $-\log_{10}(5 \times 10^{-8})$  and the suggestive significant two-sided unadjusted P-value of  $-\log_{10}(1 \times 10^{-5})$ , respectively. **(a, e)** the single-trait GWAS (**GWAS\_PSC**); **(b, f)** MTAG-identified PSC GWAS against five immune-mediated disorders, CD, UC, IBD, lupus, and PBC (**MTAG\_PSC**); **(c, g)** MTAG PSC GWAS excluding IBD (**MTAG\_PSC $\perp$ IBD**); **(d, h)** MTAG PSC GWAS in the replicate phase (**MTAG\_PSC\_R**).

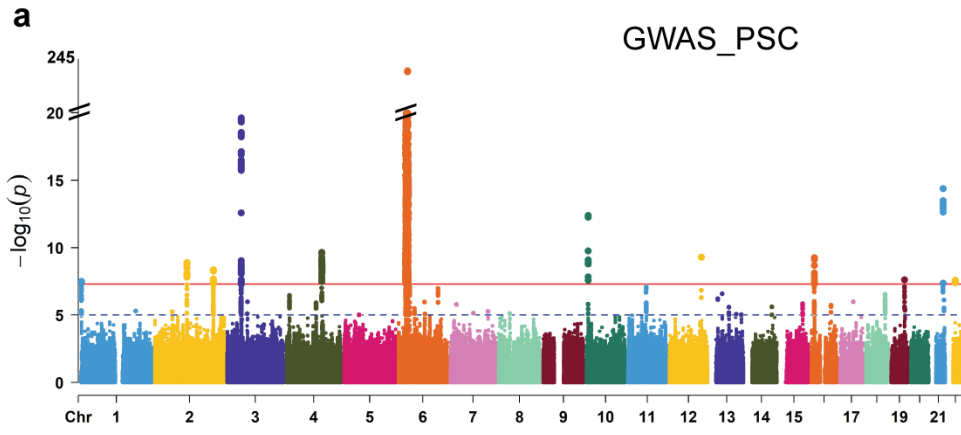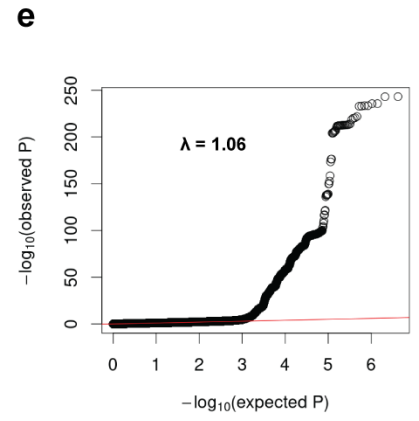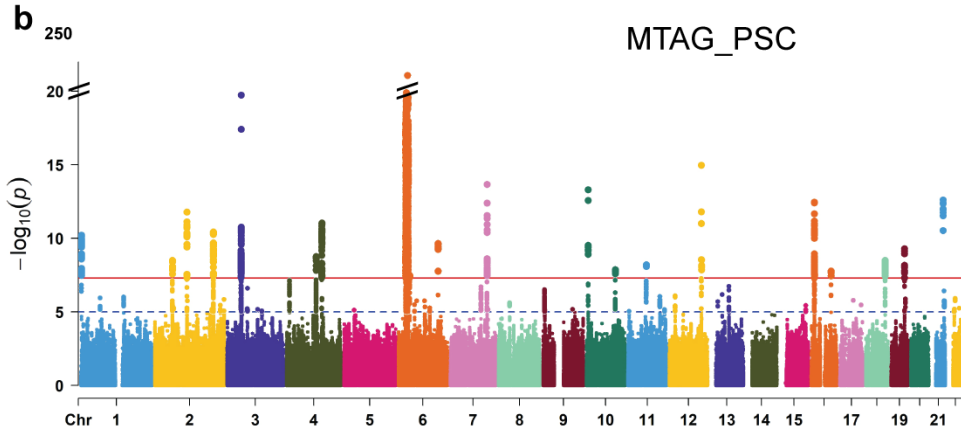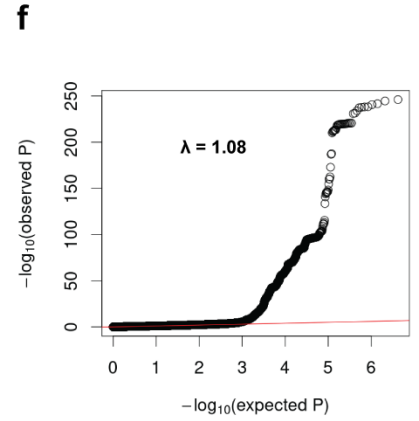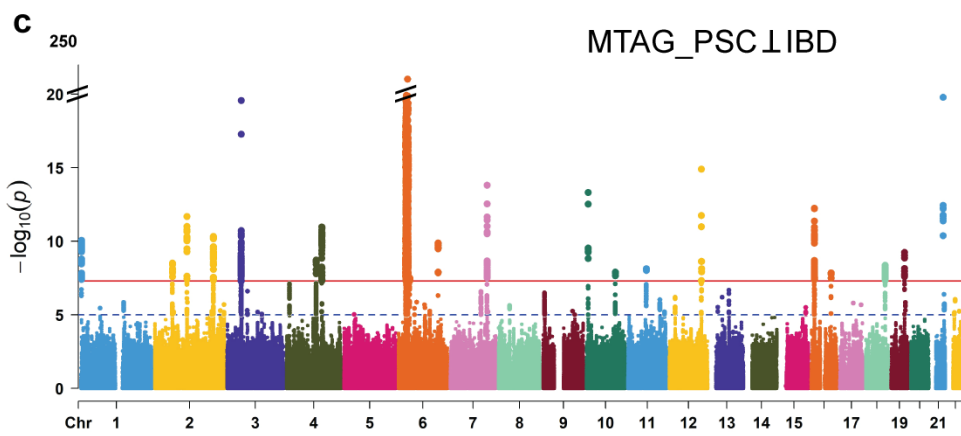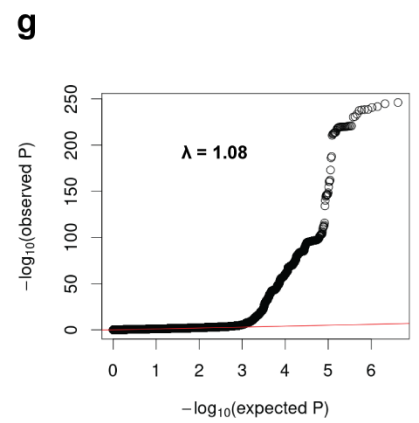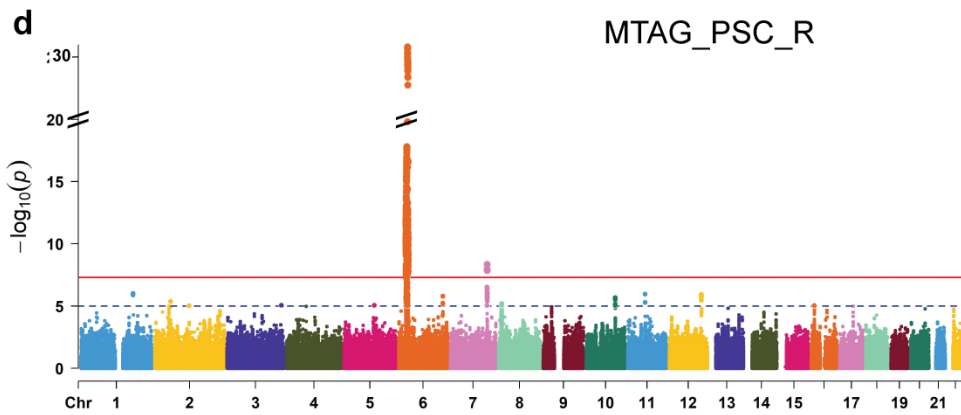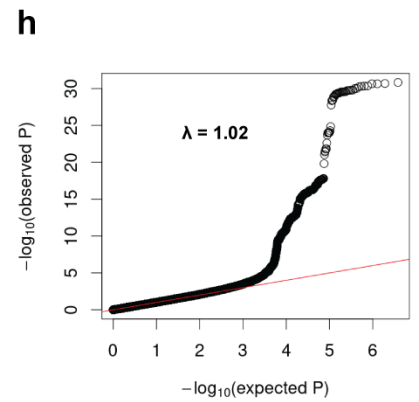

**Supplementary Figure 3. Interactions of chromatin and eQTL within PSC risk loci.** Genes mapped by either Hi-C (orange), or eQTL (green) are shown on the inner circle. Genes mapped by both Hi-C and eQTL are shown in red on the inner circle. The most outer layer represents Manhattan plot including only SNPs with  $P < 0.05$ . SNPs in genomic risk loci are color-coded as a function of their maximum LD  $r^2$  to the one of the independent significant SNPs in each locus, as follows:  $r^2 > 0.8$  in red,  $r^2 > 0.6$  in orange,  $r^2 > 0.4$  in green,  $r^2 > 0.2$  in blue. SNPs not in LD with any of the independent significant SNPs ( $r^2 \leq 0.2$ ) are grey. The rsIDs of the top SNPs in each risk locus are displayed in the most outer layer. Y-axis ranges from 0 to the maximum  $-\log_{10}(P\text{-value})$  of the SNPs. The second layer displays the chromosome ring and genomic risk locus highlighted in blue. The third layer aligns the position of genes with genomic coordinate and genomic risk locus in blue. **(a)** 2p16.1; **(b)** 3p21.31; **(c)** 4q24; **(d)** 6p21.2; **(e)** 7q32.1; **(f)** 10q24.2, **(g)** 16q22.1; **(f)** 21q22.2.

**a**

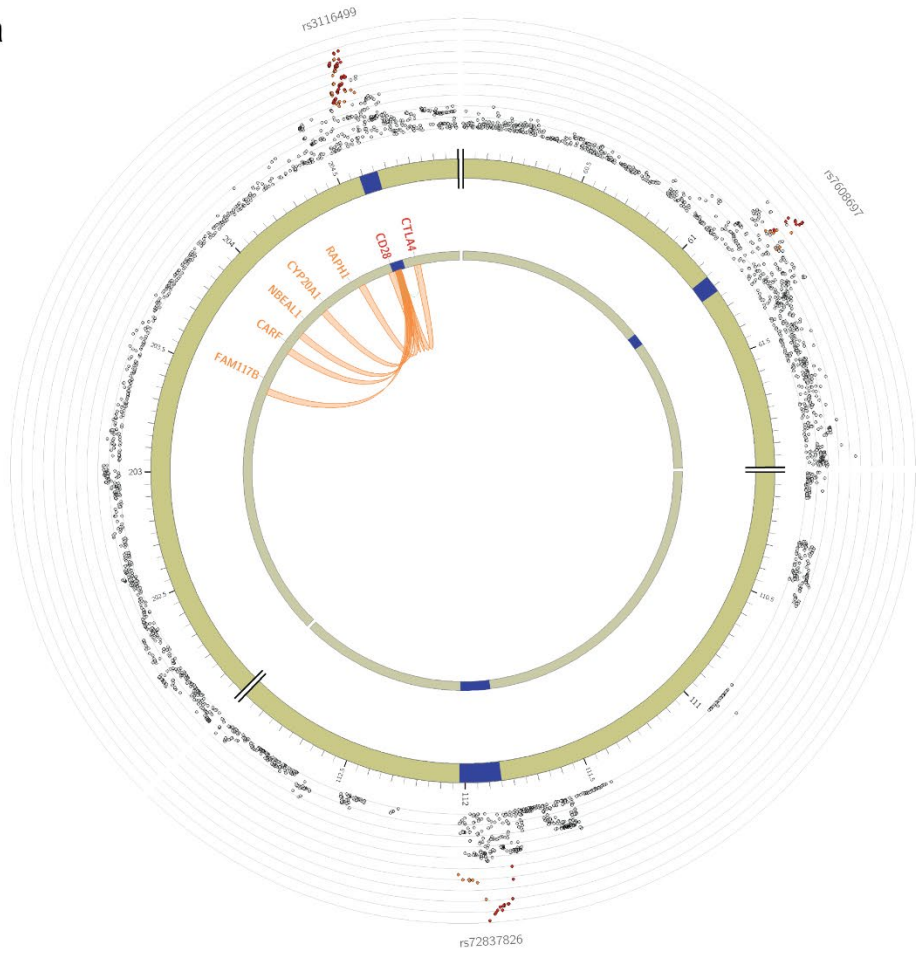

**b**

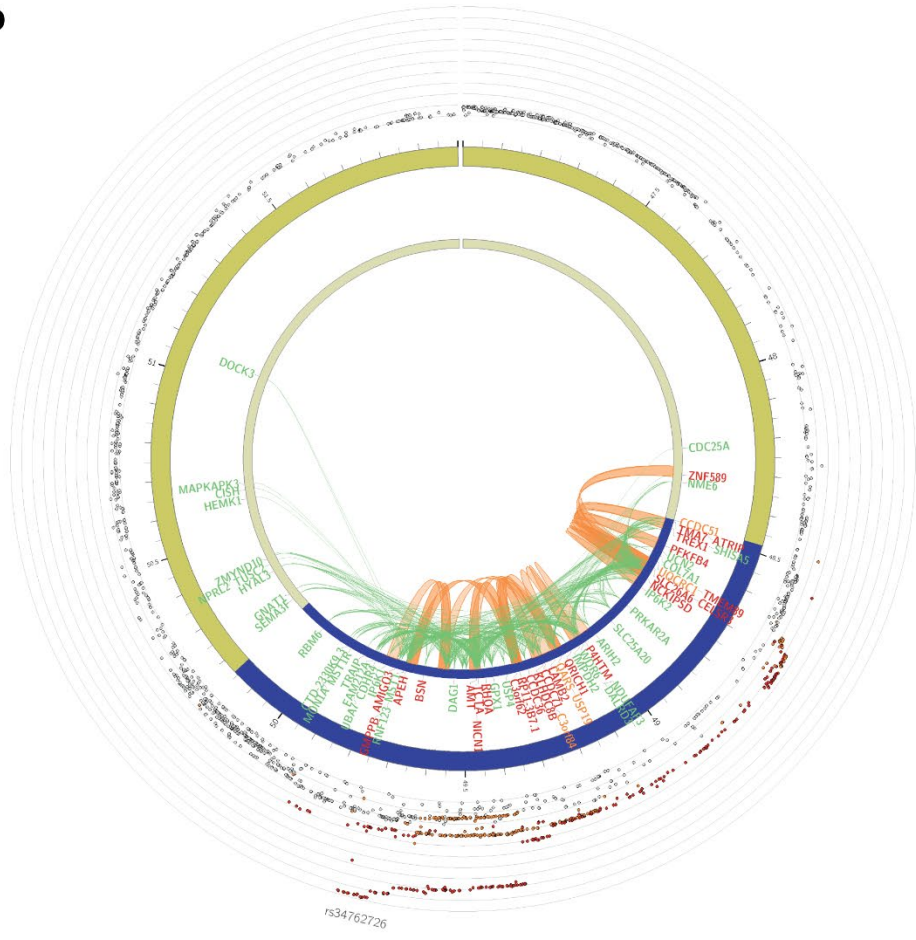



**c**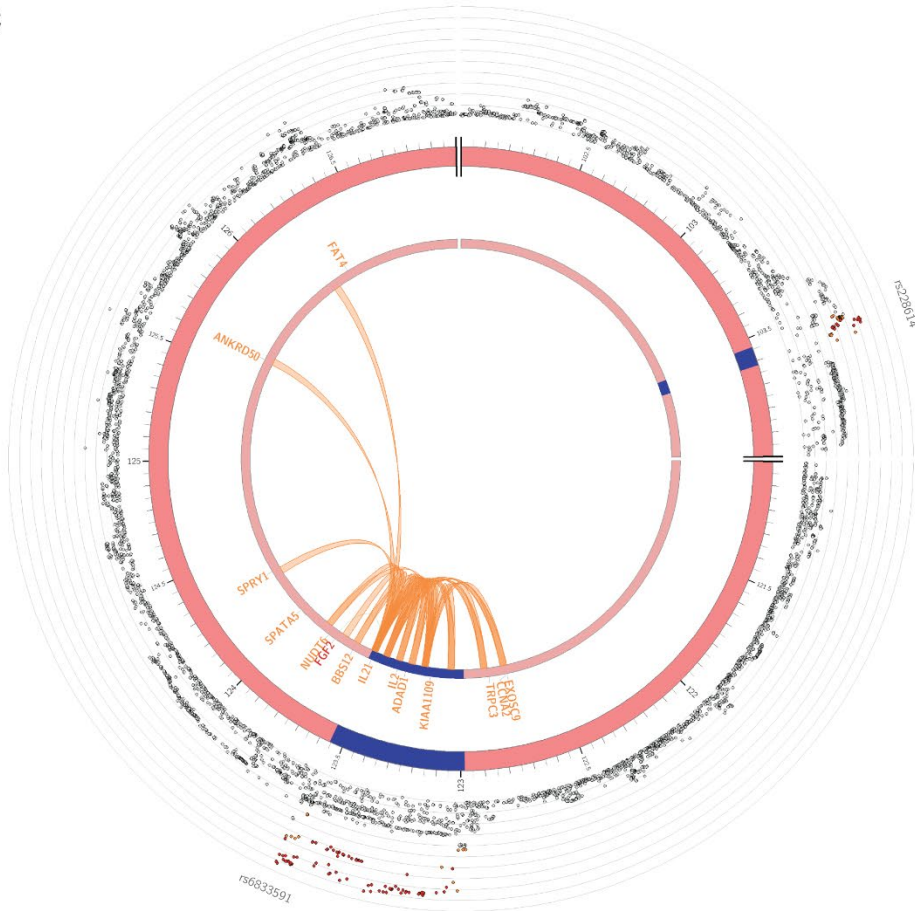**d**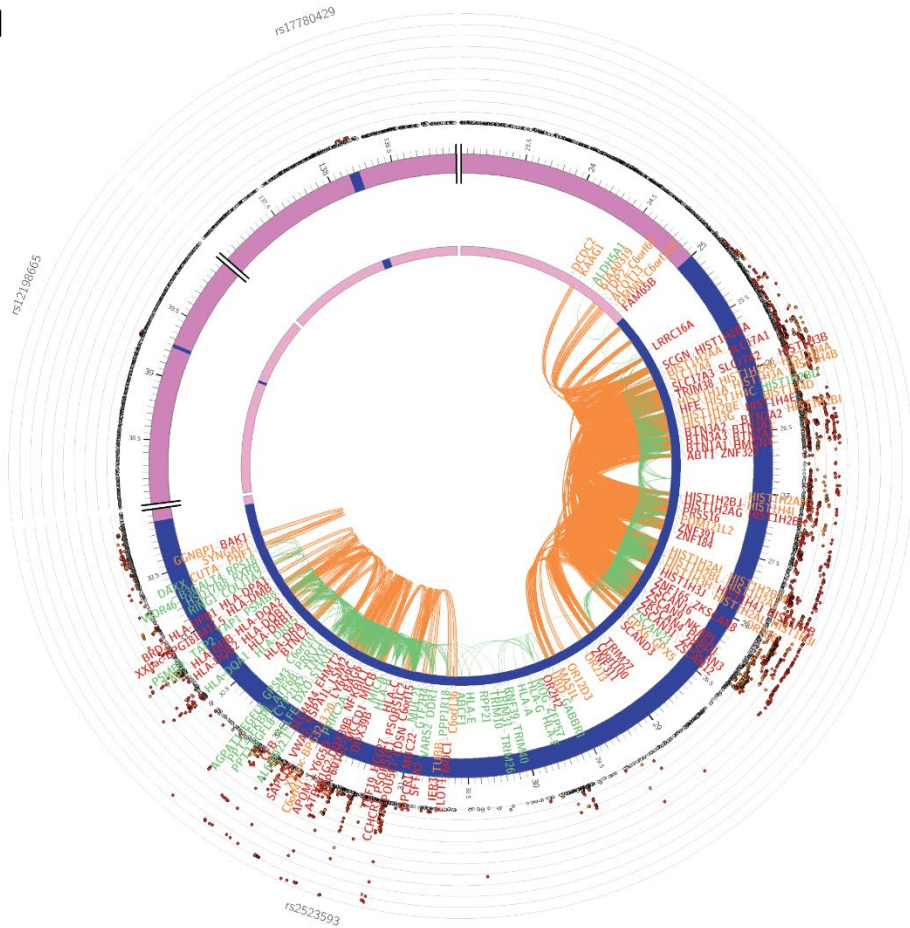

**e**

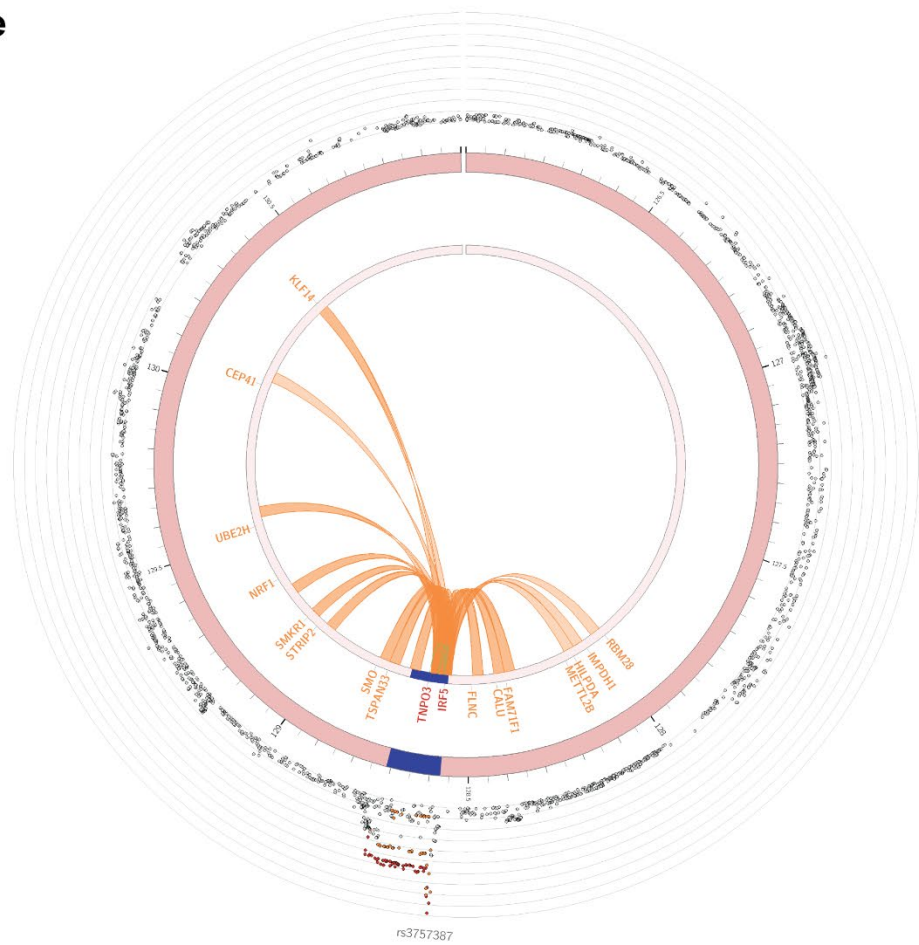

**f**

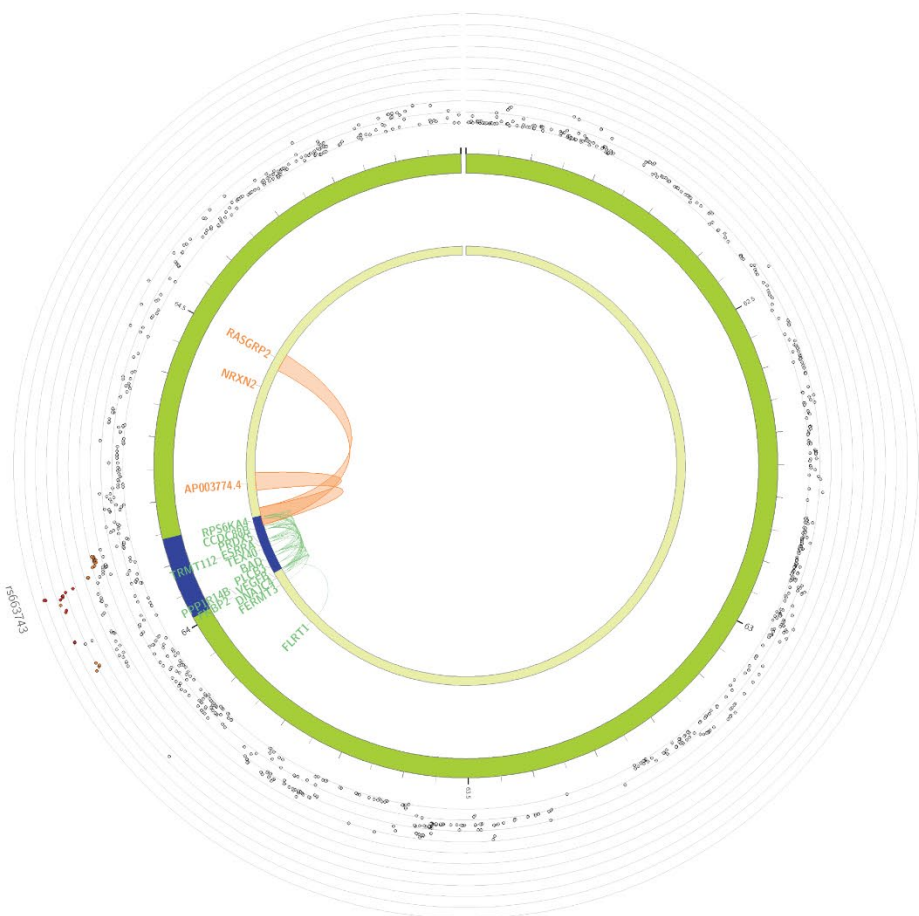

**g**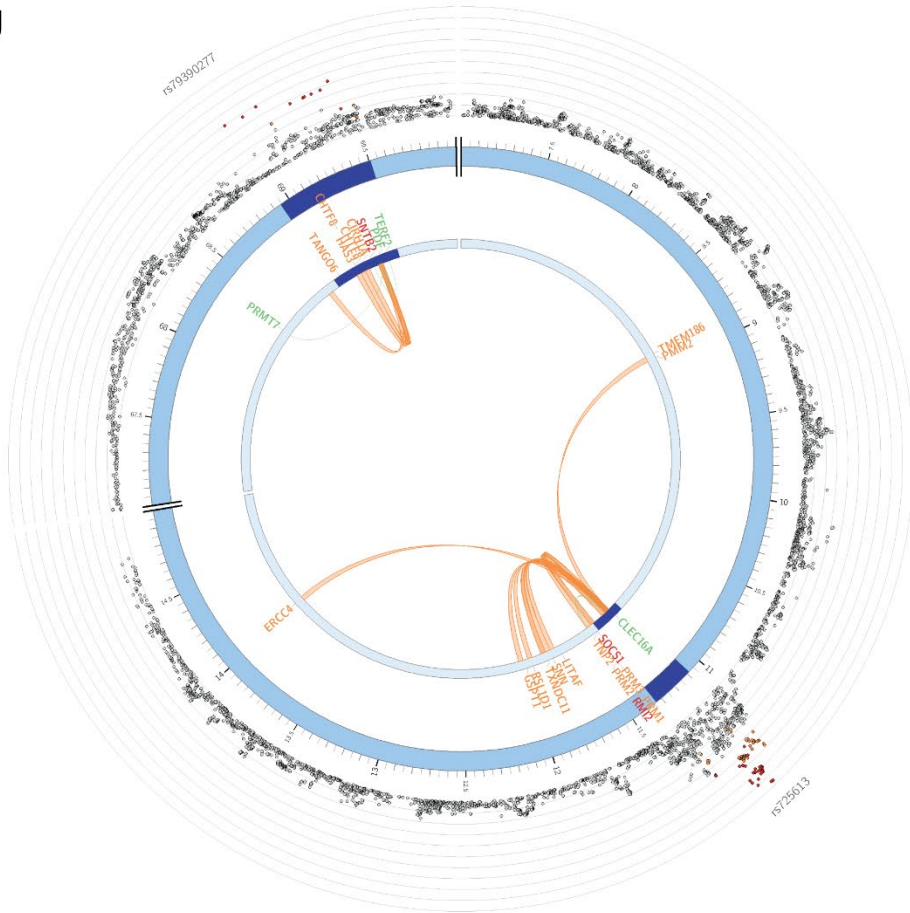**h**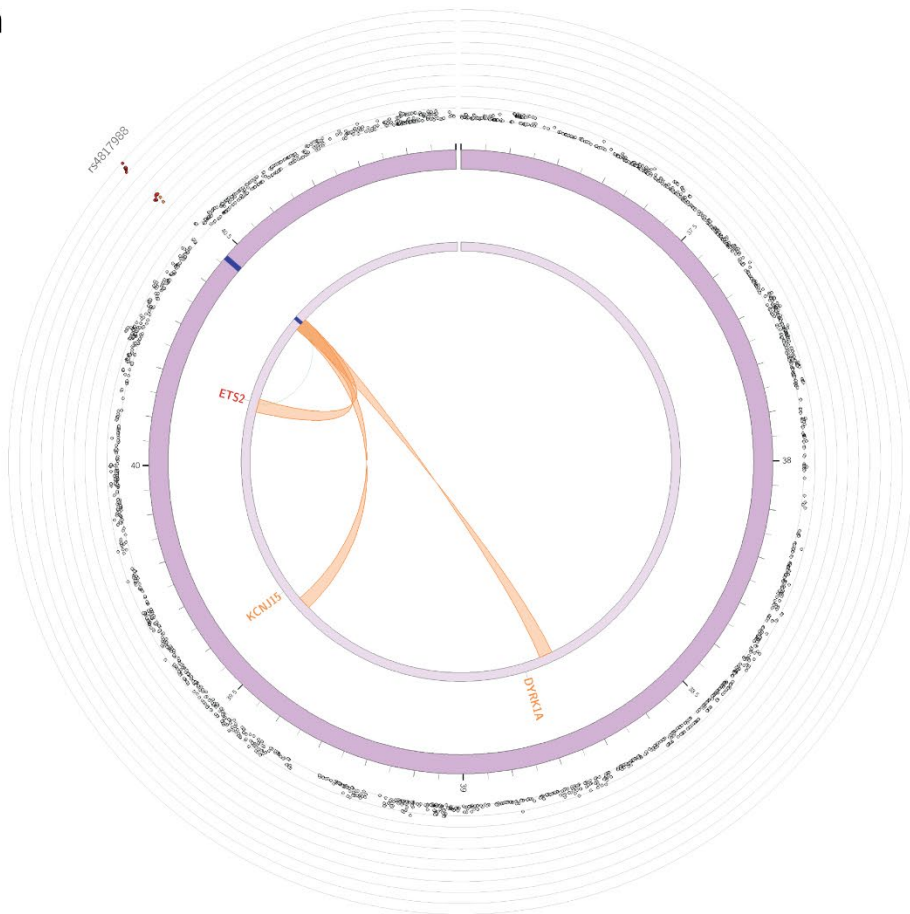

**Supplementary Figure 4. Colocalization plots between PSC MTAG and eQTL tissue.** Functional validation of the MTAG-identified PSC candidate genes suggests the plausible posterior probability that both PSC and tested tissue are associated and share a single function variant (PP4) at the threshold of  $PP4 > 0.80$ . **(a1-a3)** Tissue-specific colocalization for *MANBA*; **(bC1-b30)** for *IRF5*; **(c1-c3)** for *NKX2-3*.

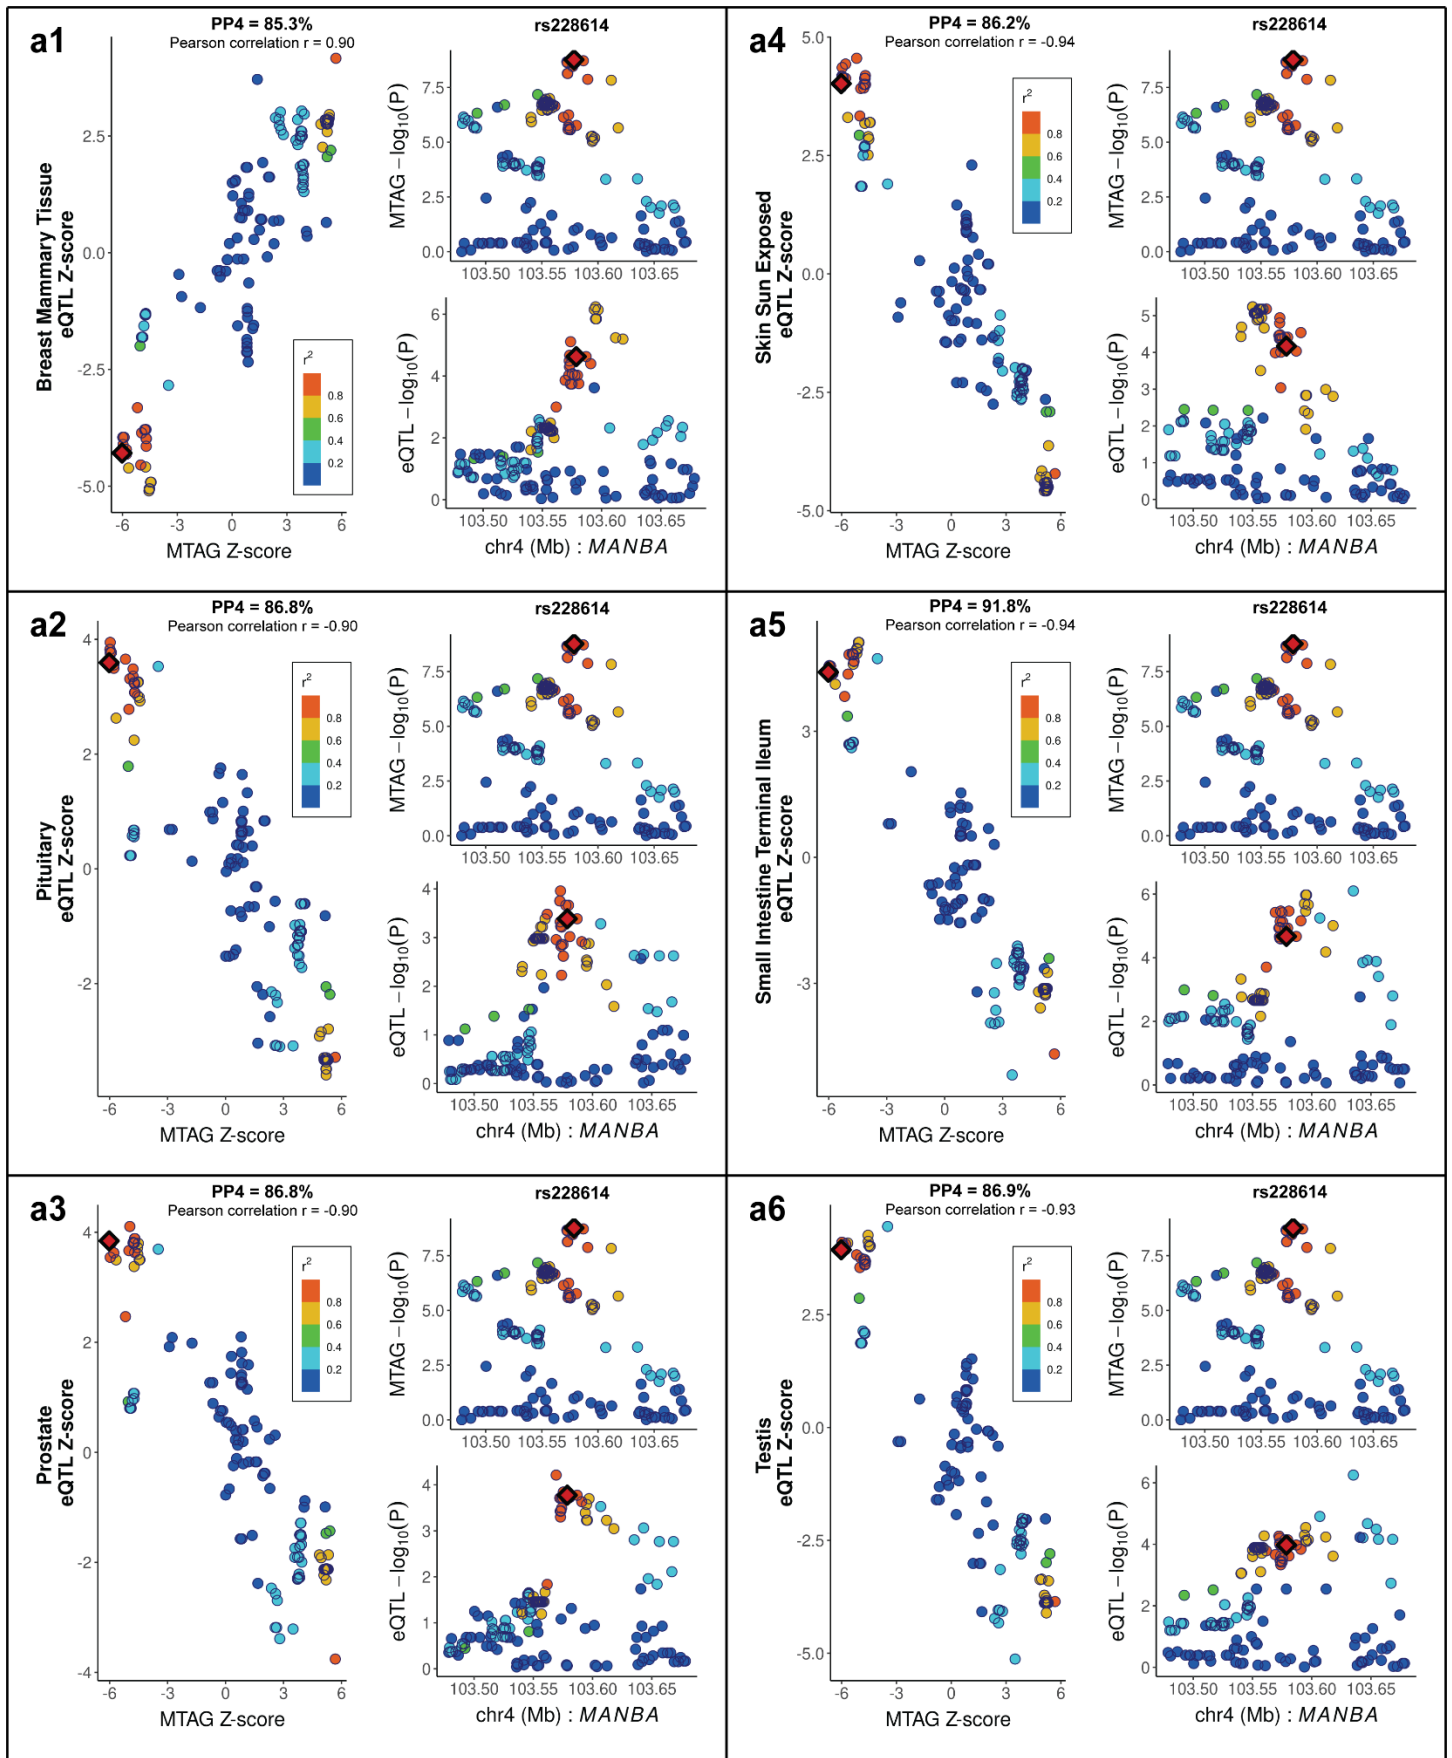

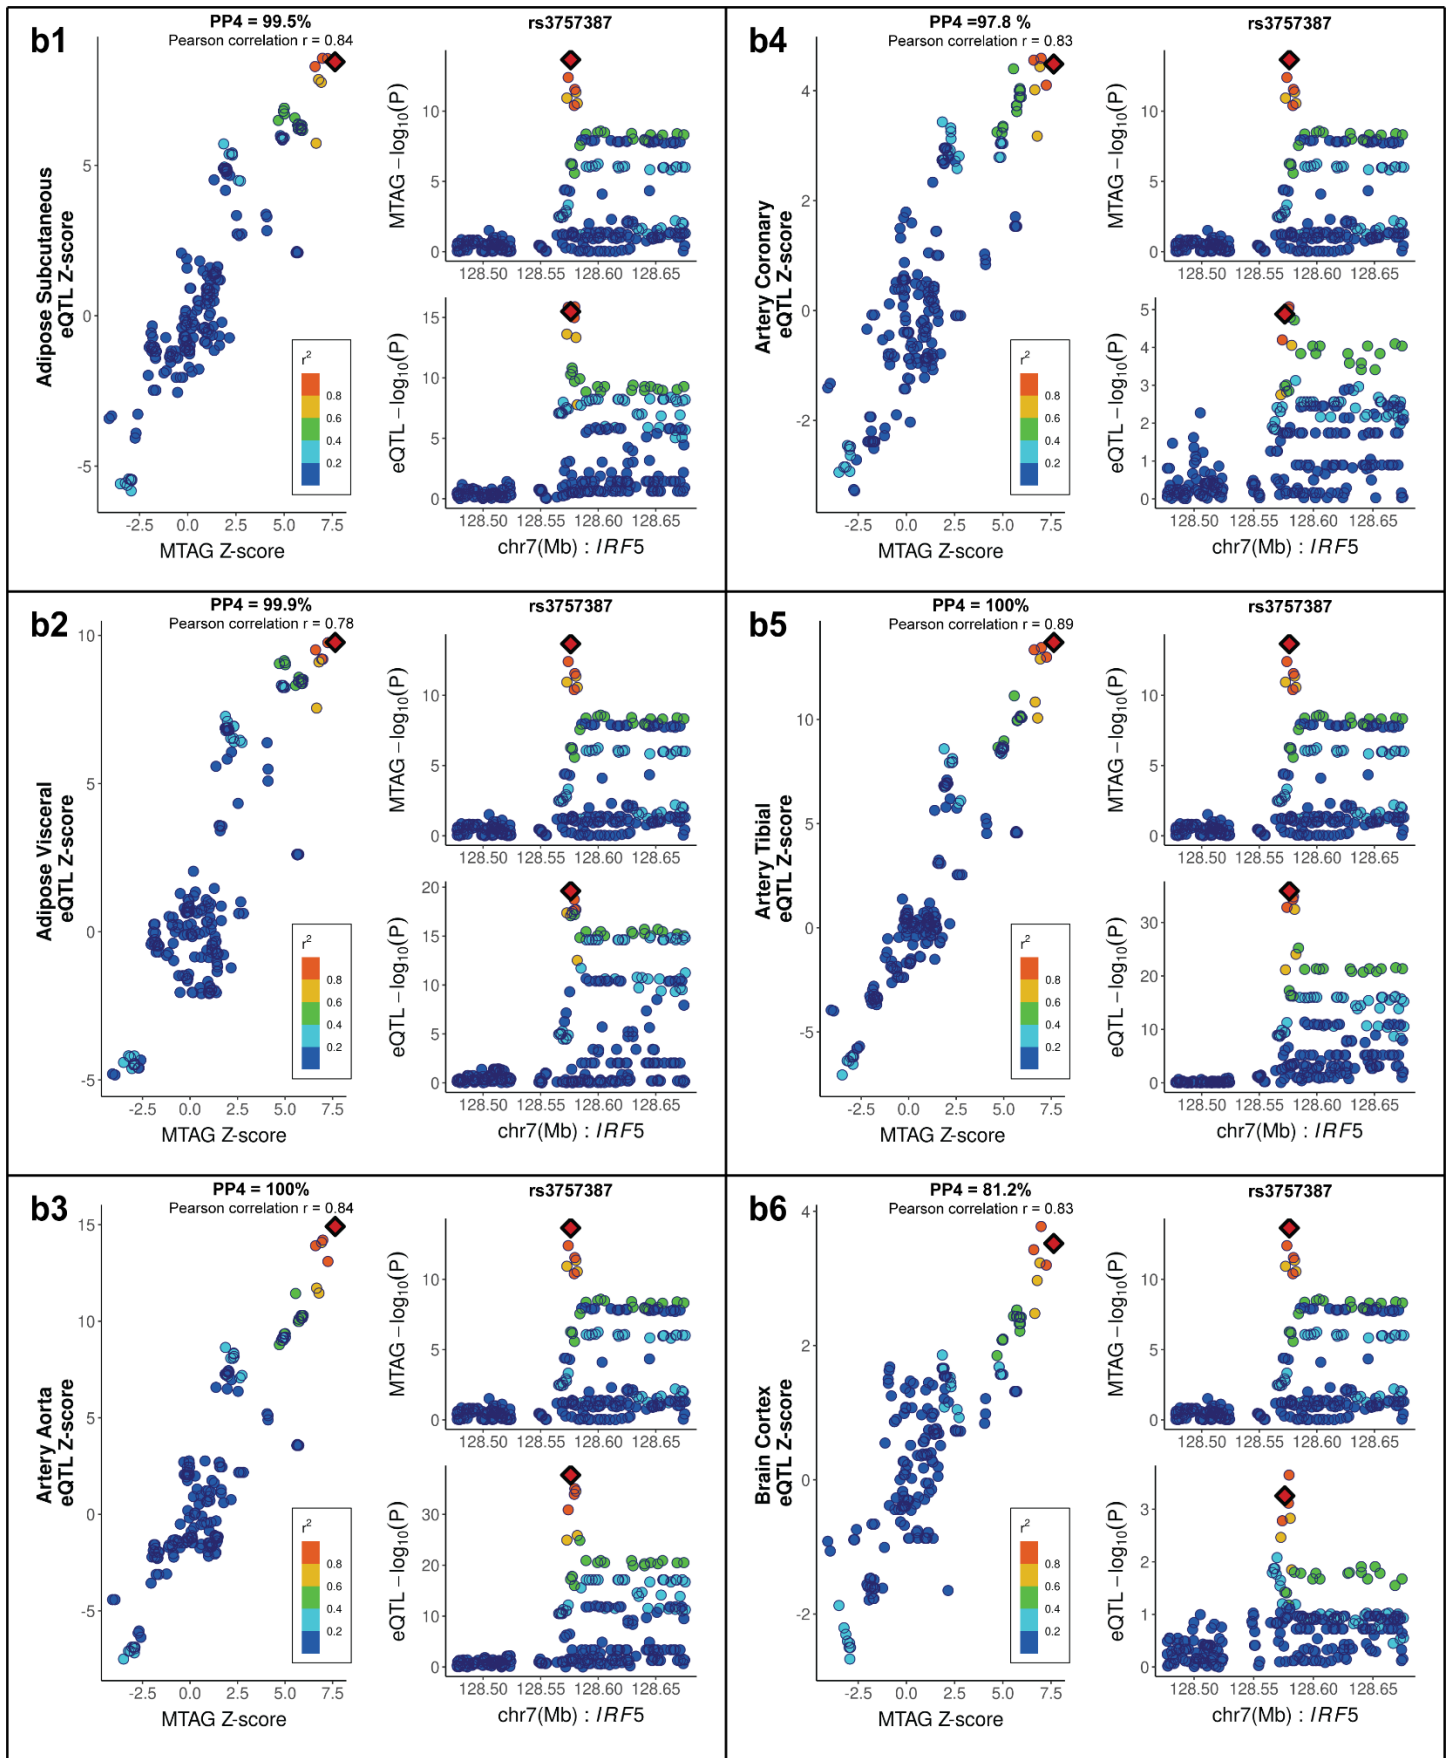

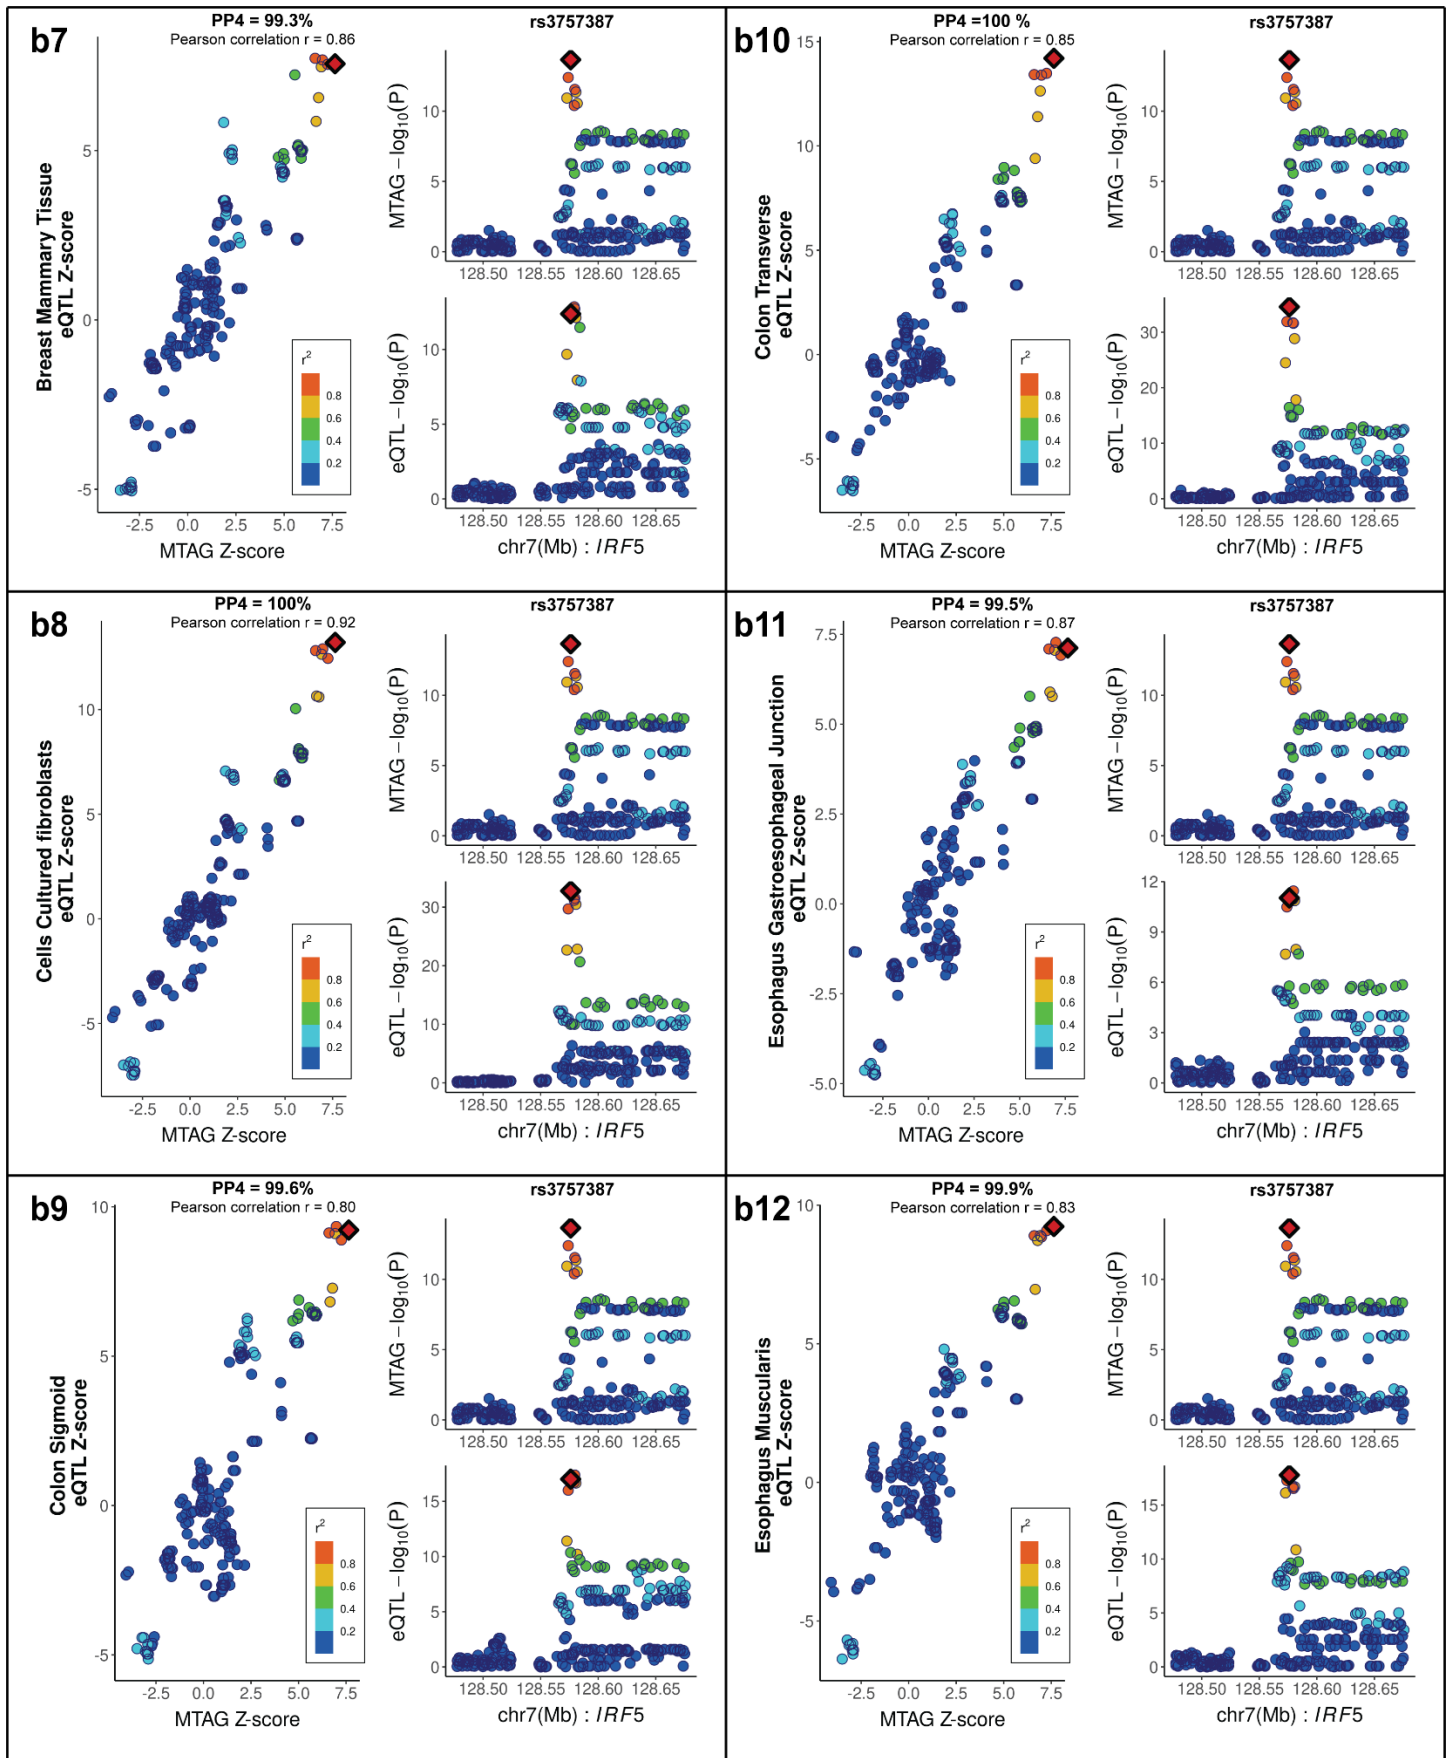

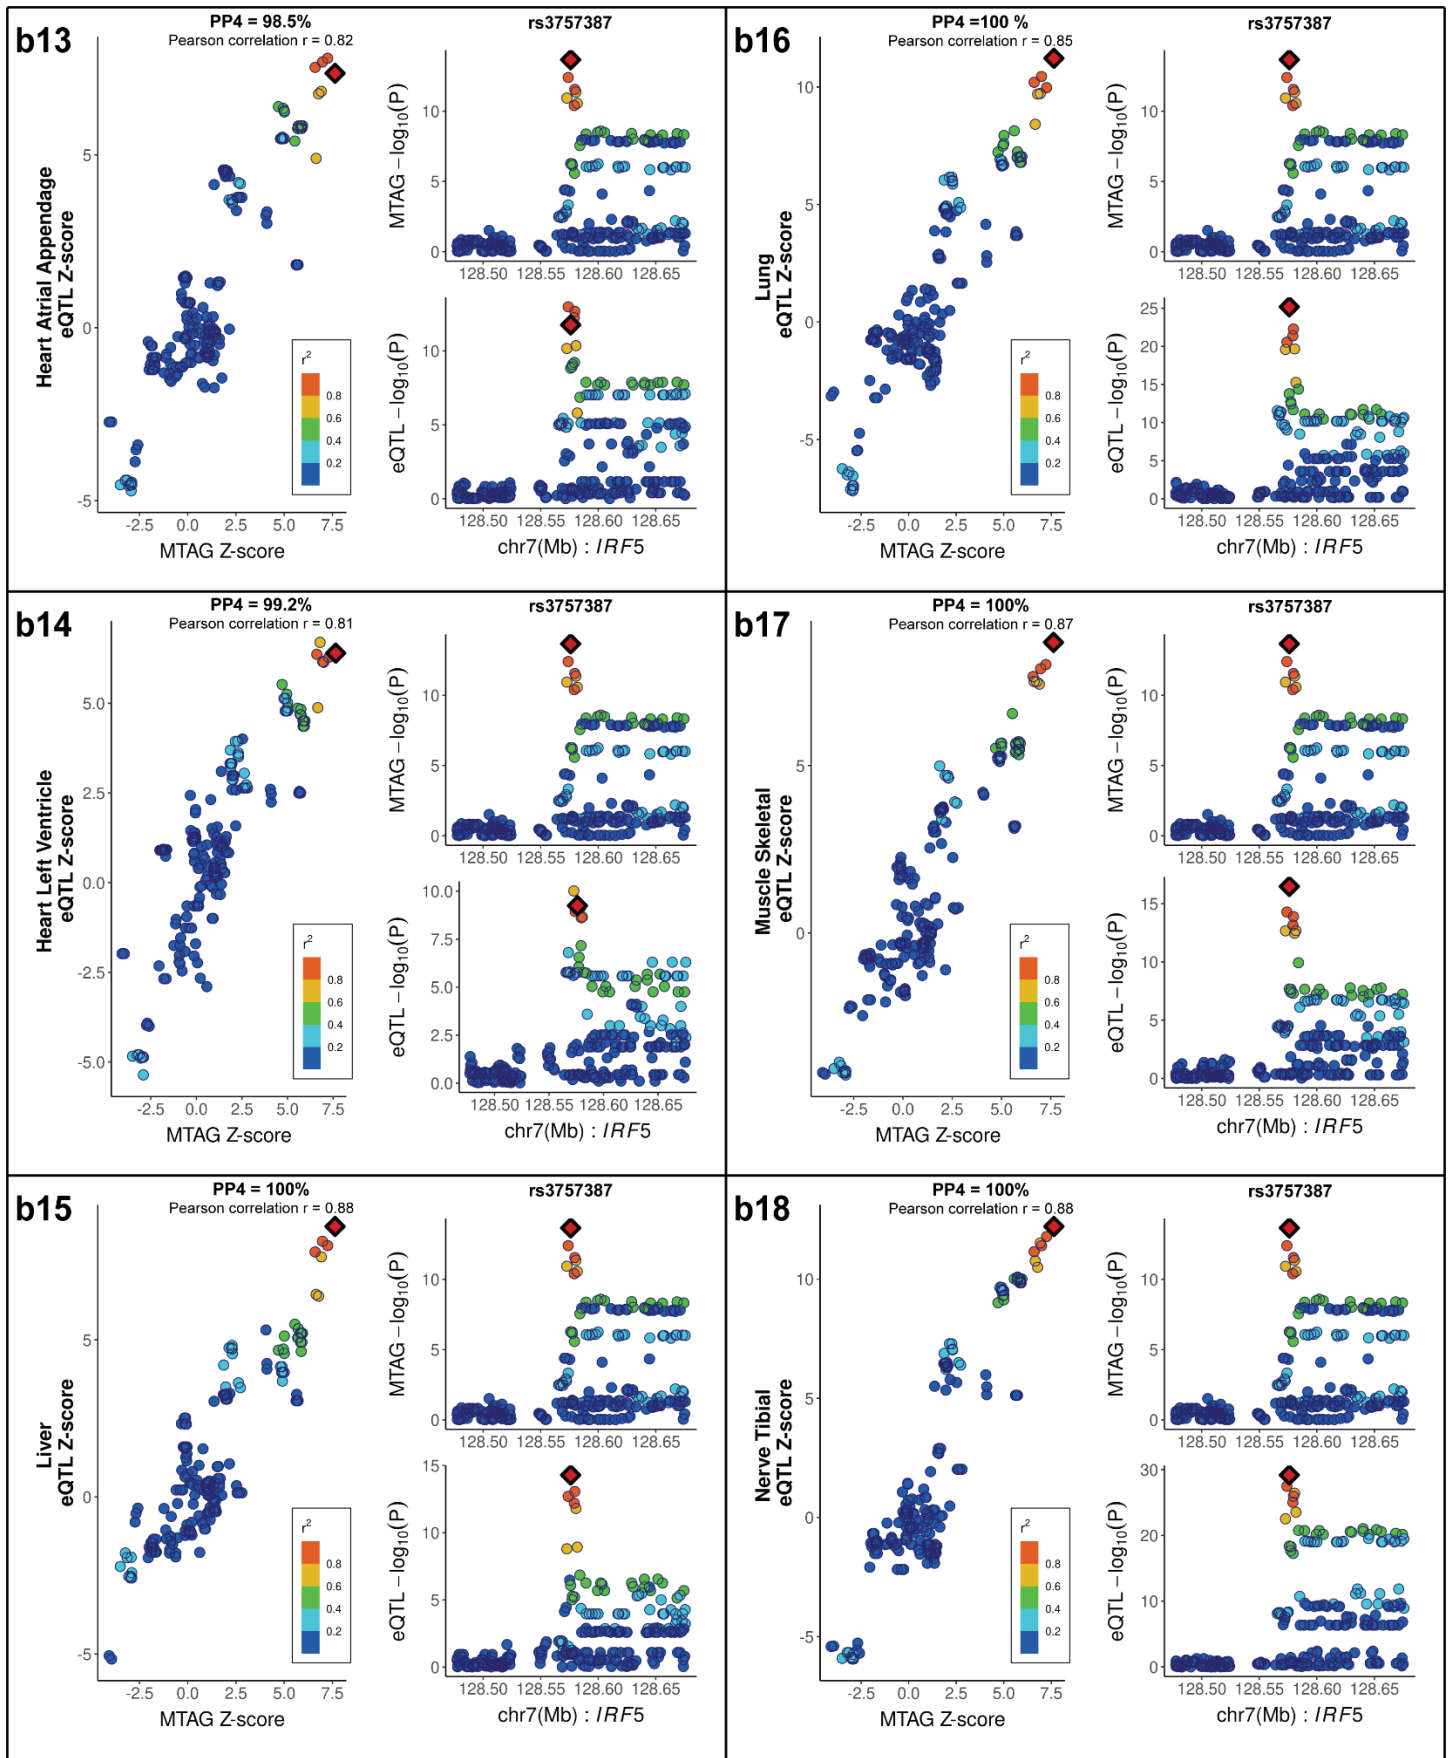



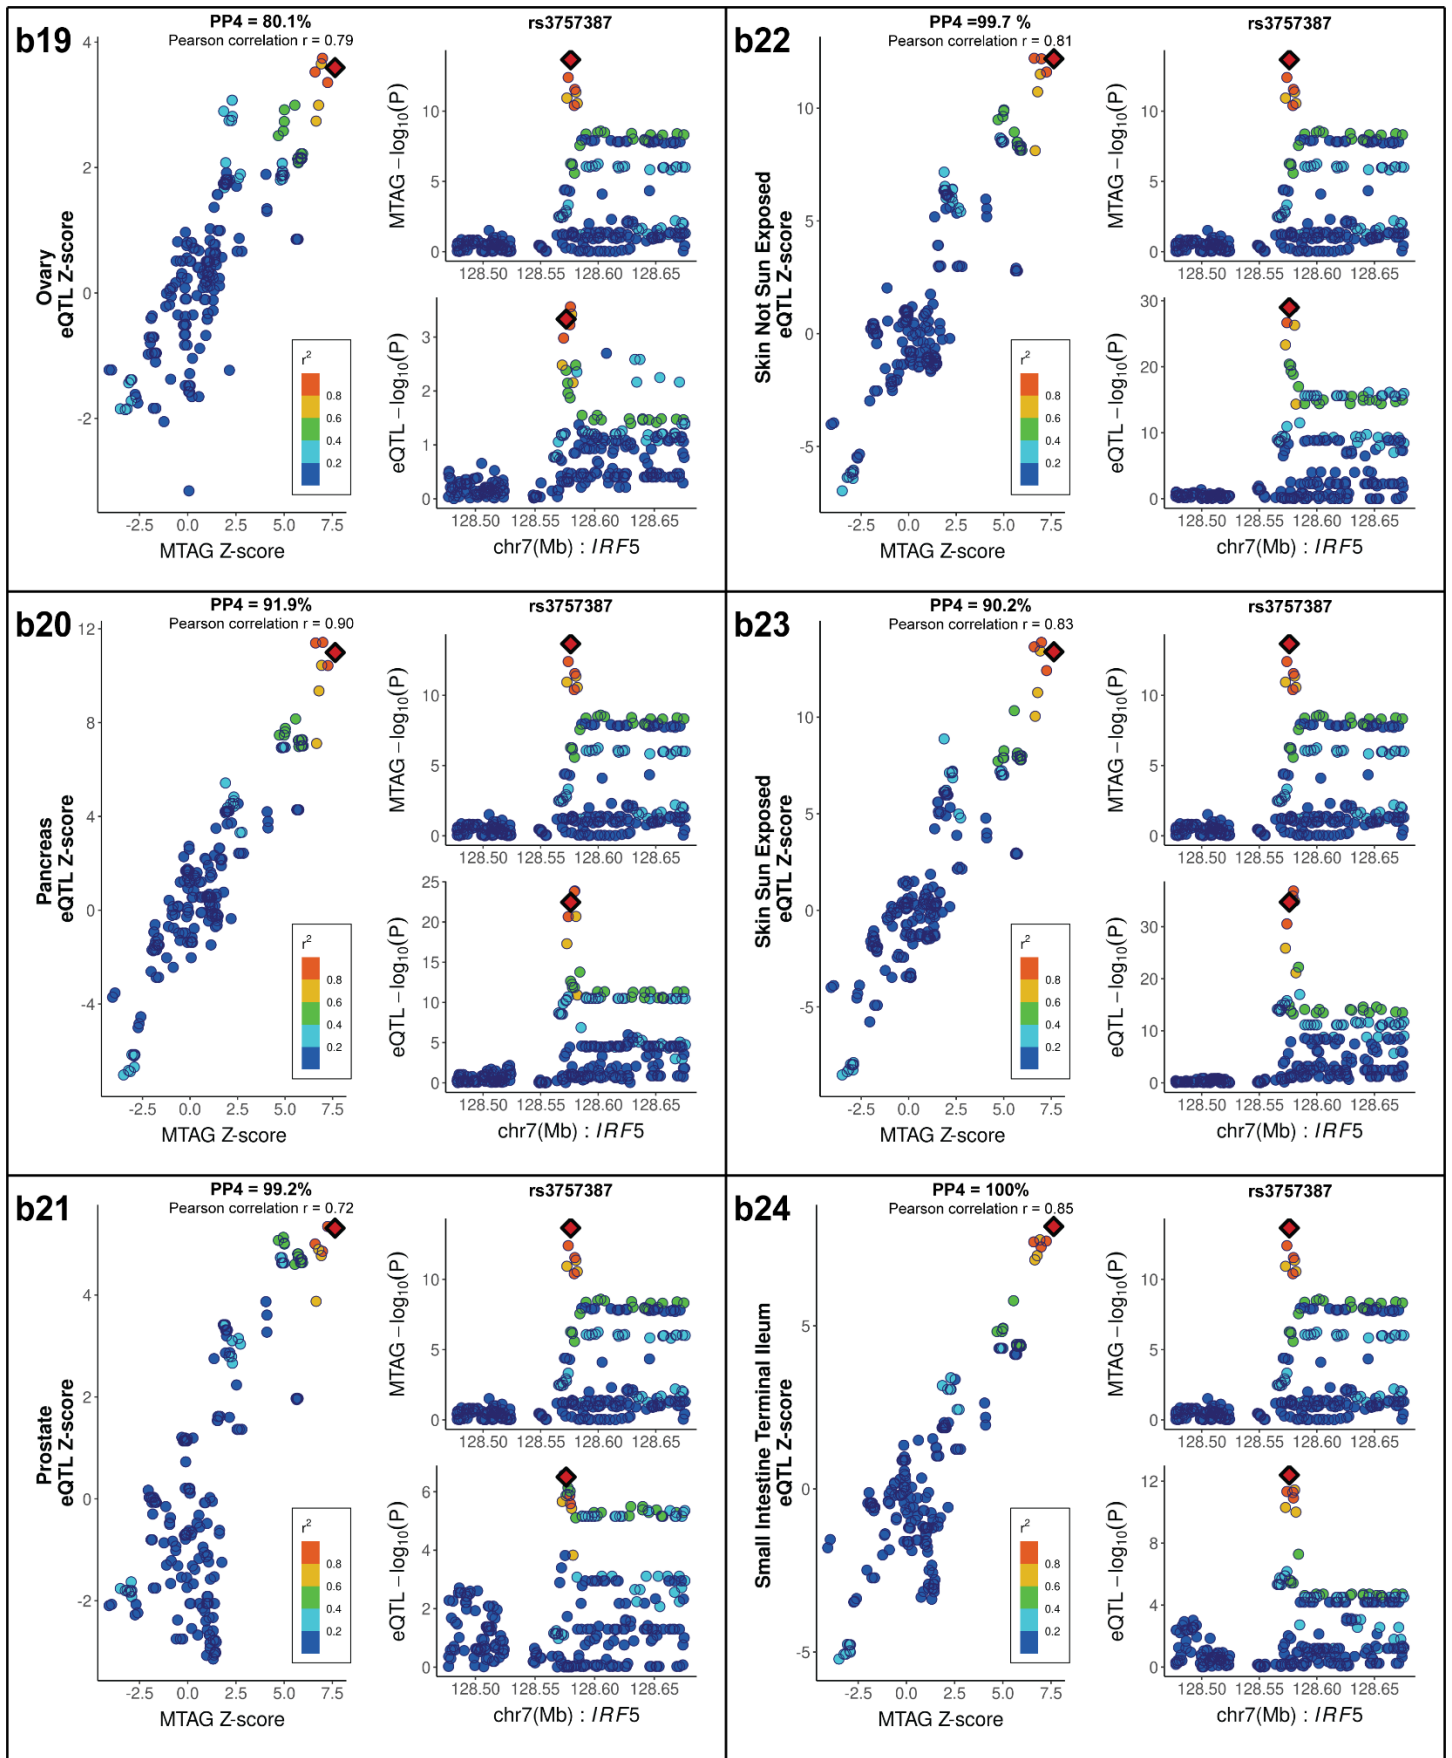

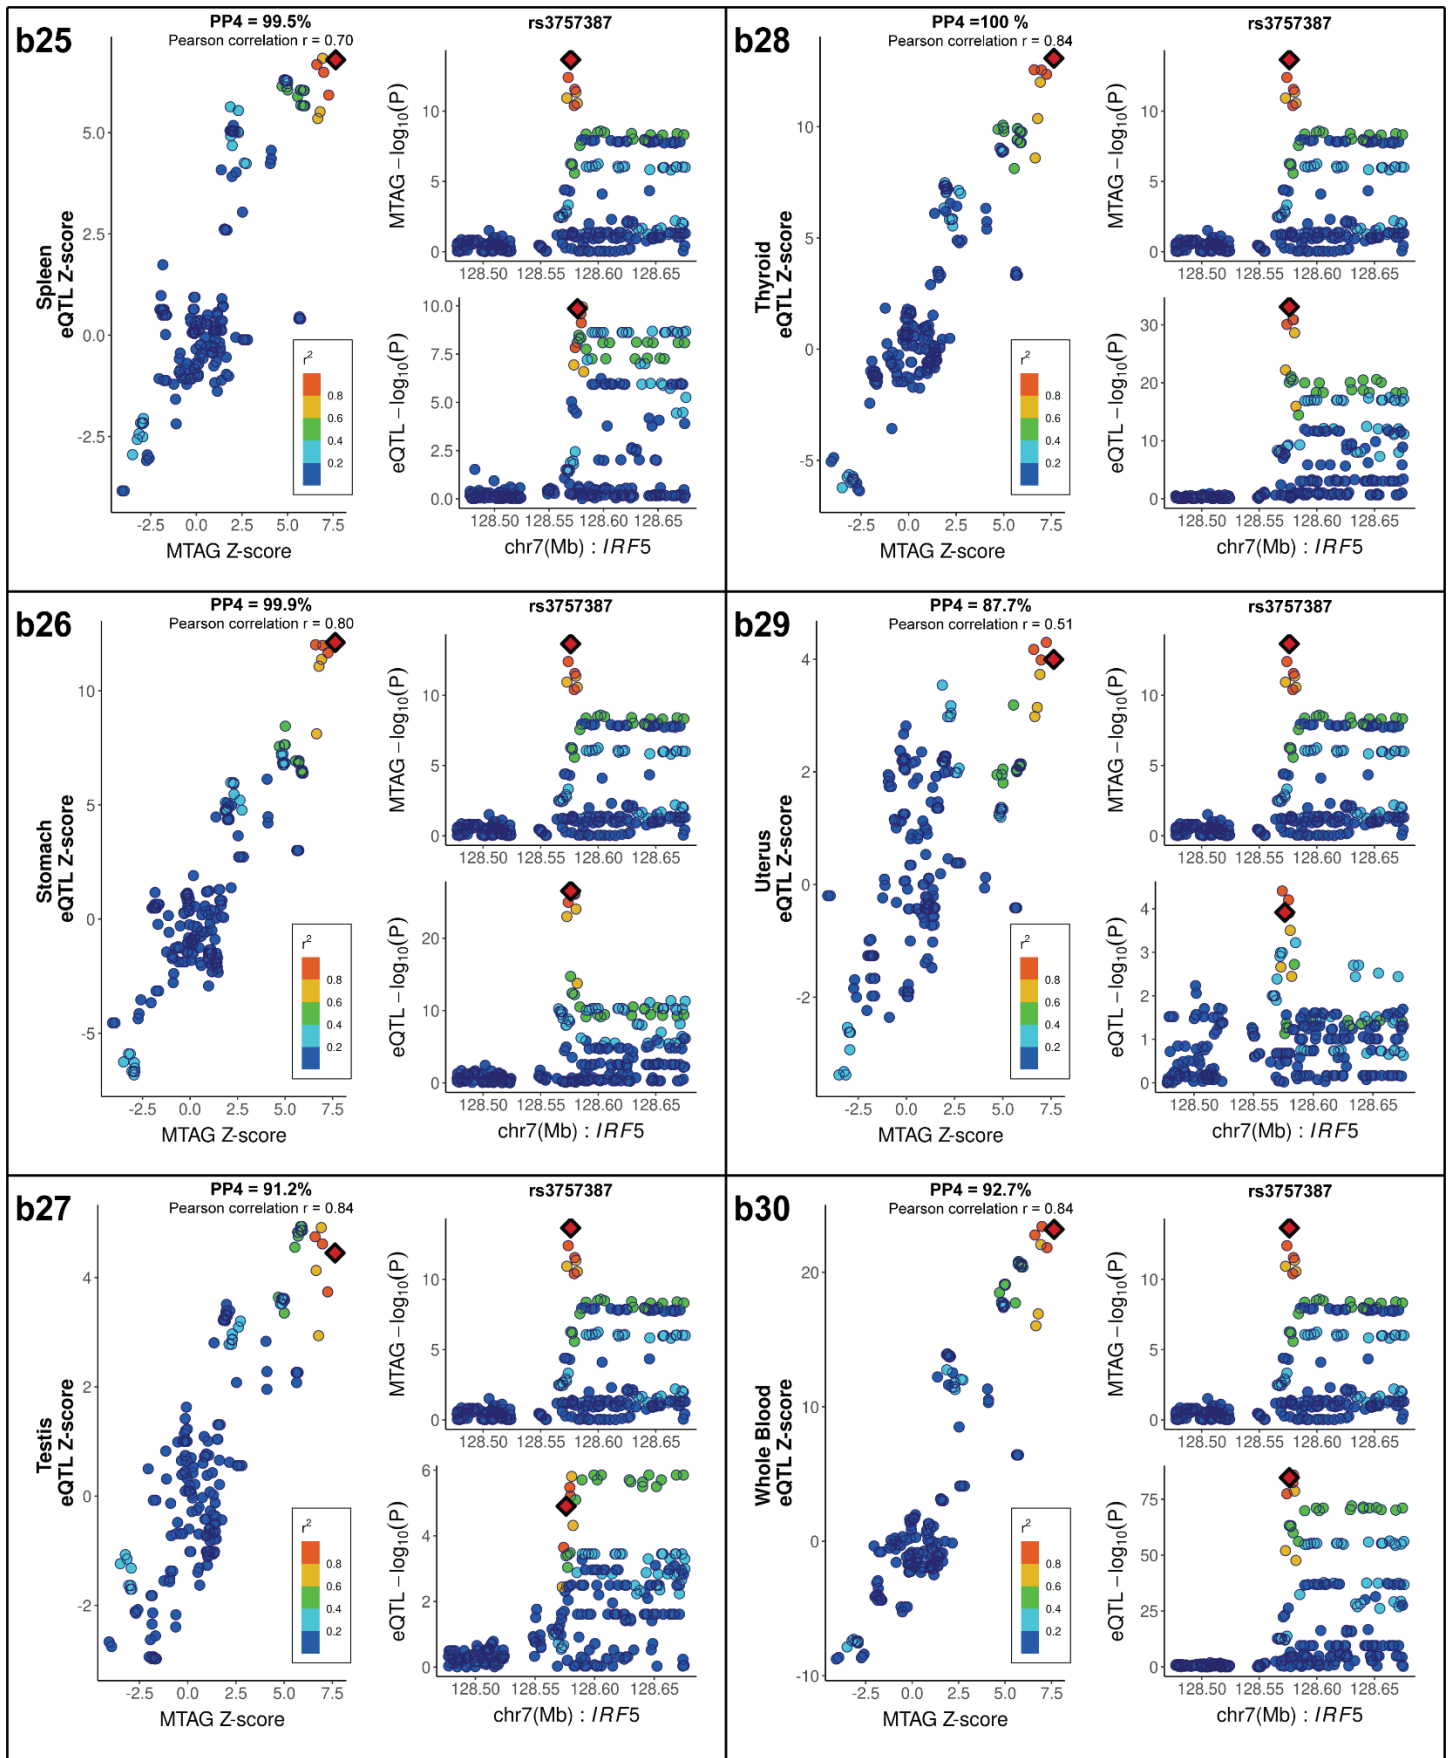

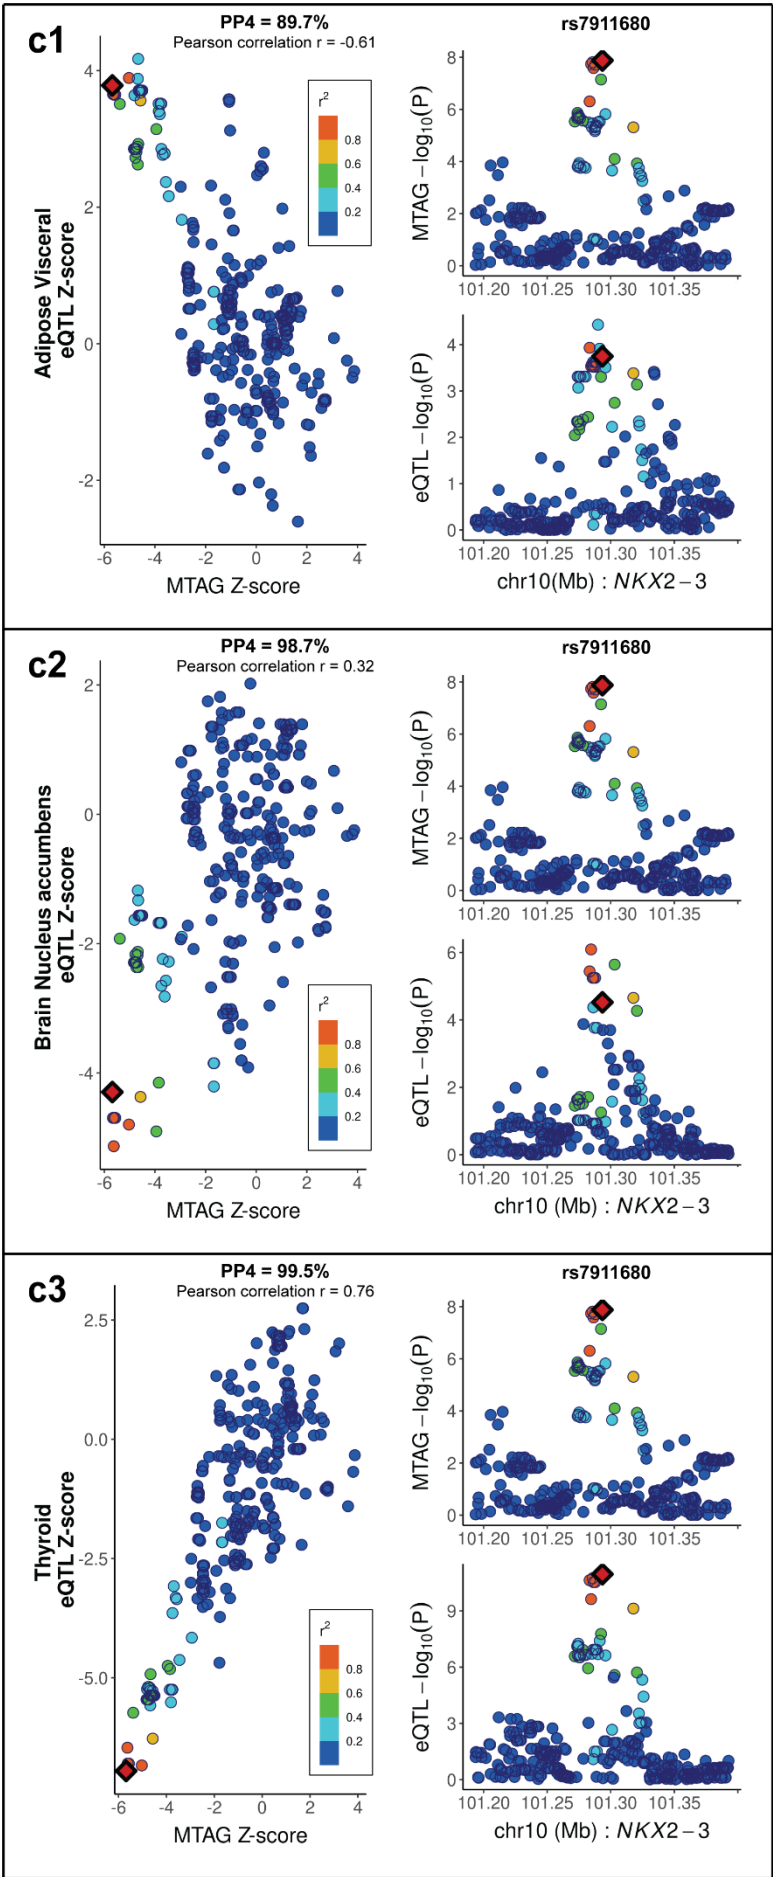

**Supplementary Figure 5. STRING protein-protein interaction (PPI) plots modeled in STRING using 406 candidate genes.** The prioritized 406 genes displayed relevant groups of related genes involved in the regulation of specific biological pathways using PPI networks. Results of highly enriched pathways using STRING PPI are shown in Supplementary Data 13.

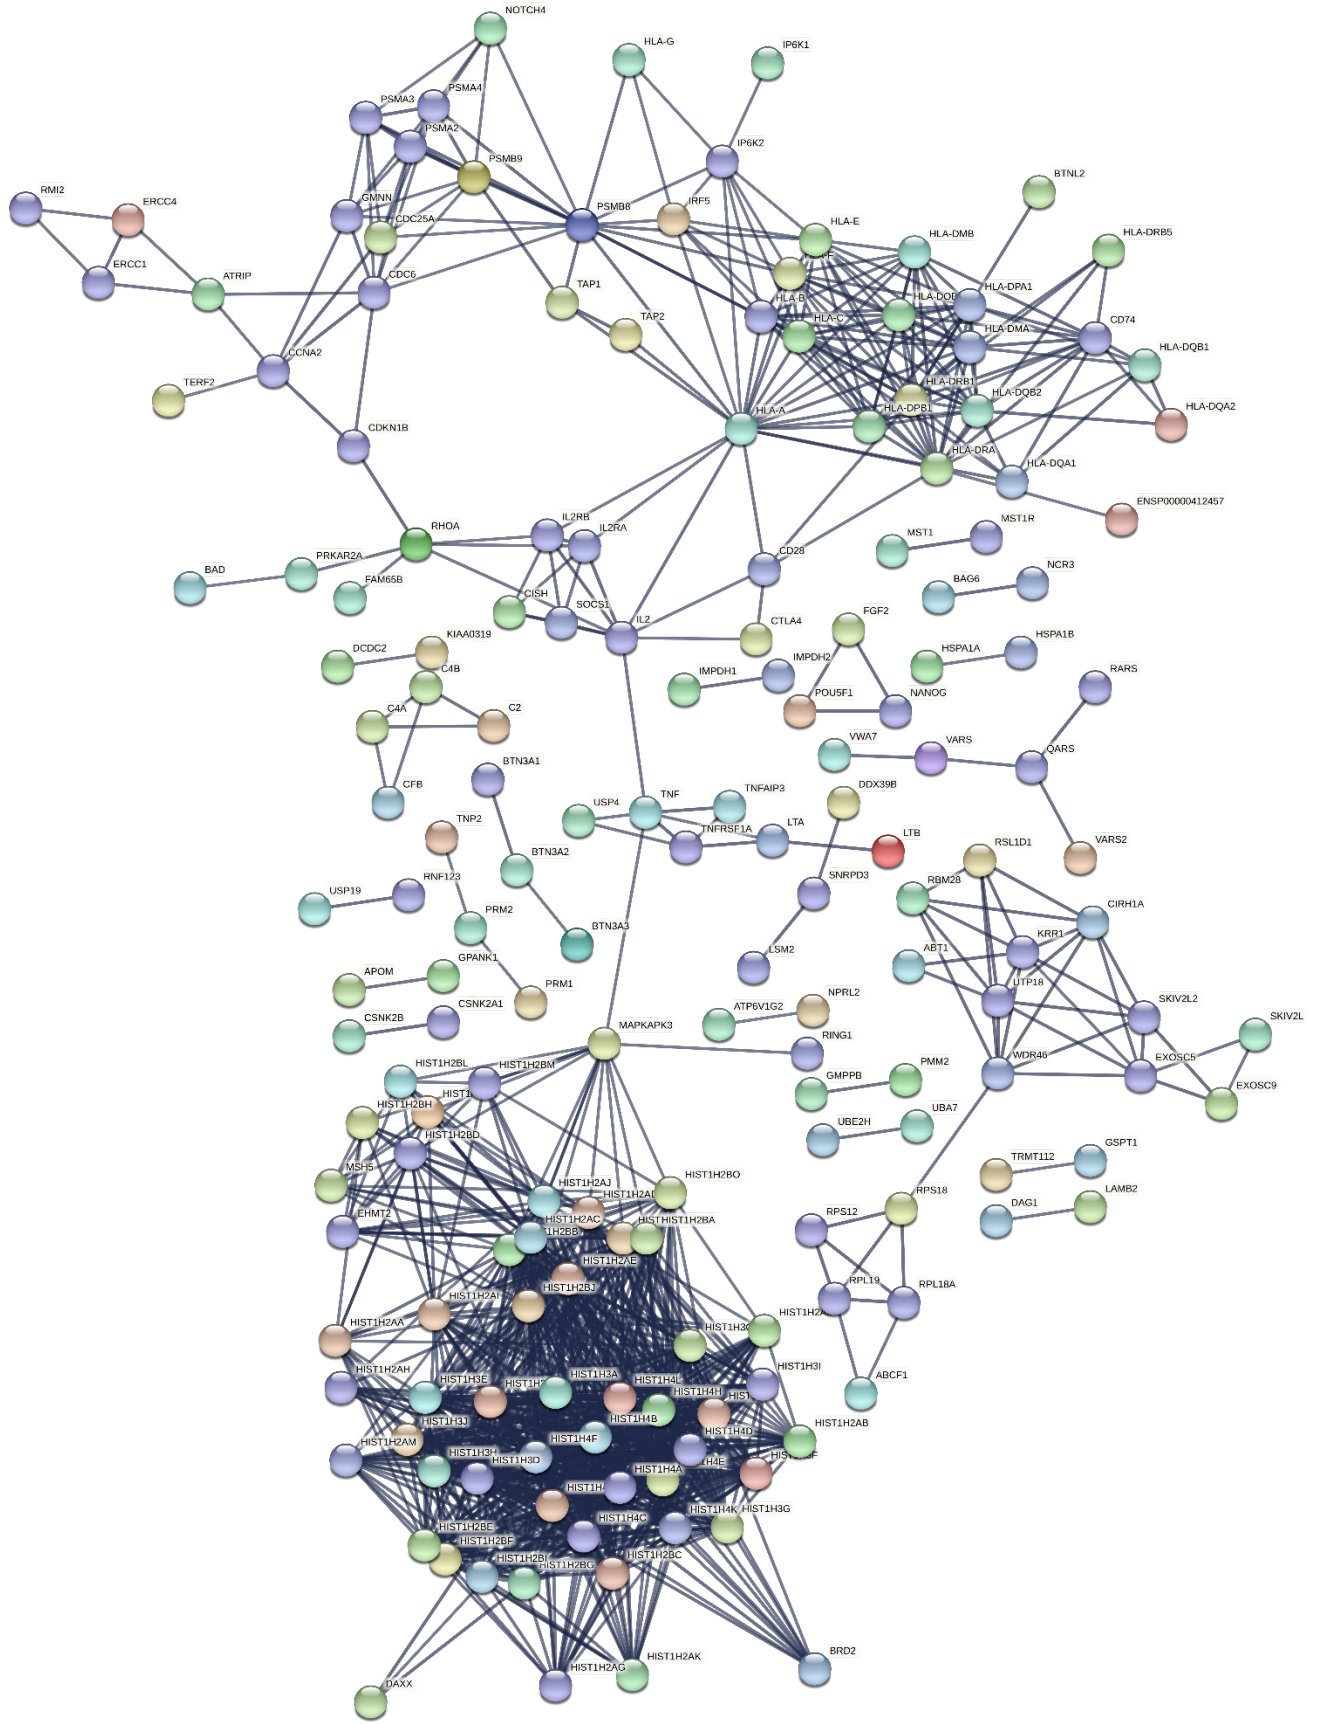

**Supplementary Figure 6. STRING protein-protein interaction (PPI) plots modeled in STRING. MTAG-identified PSC-specific candidate gene network reported for (a) *MANBA* (PPI enrichment P-value,  $P=5.16 \times 10^{-14}$ ); (b) for *IRF5* ( $P=1.00 \times 10^{-16}$ ); (c) for *NKX2-3* ( $P=1.13 \times 10^{-9}$ ).**

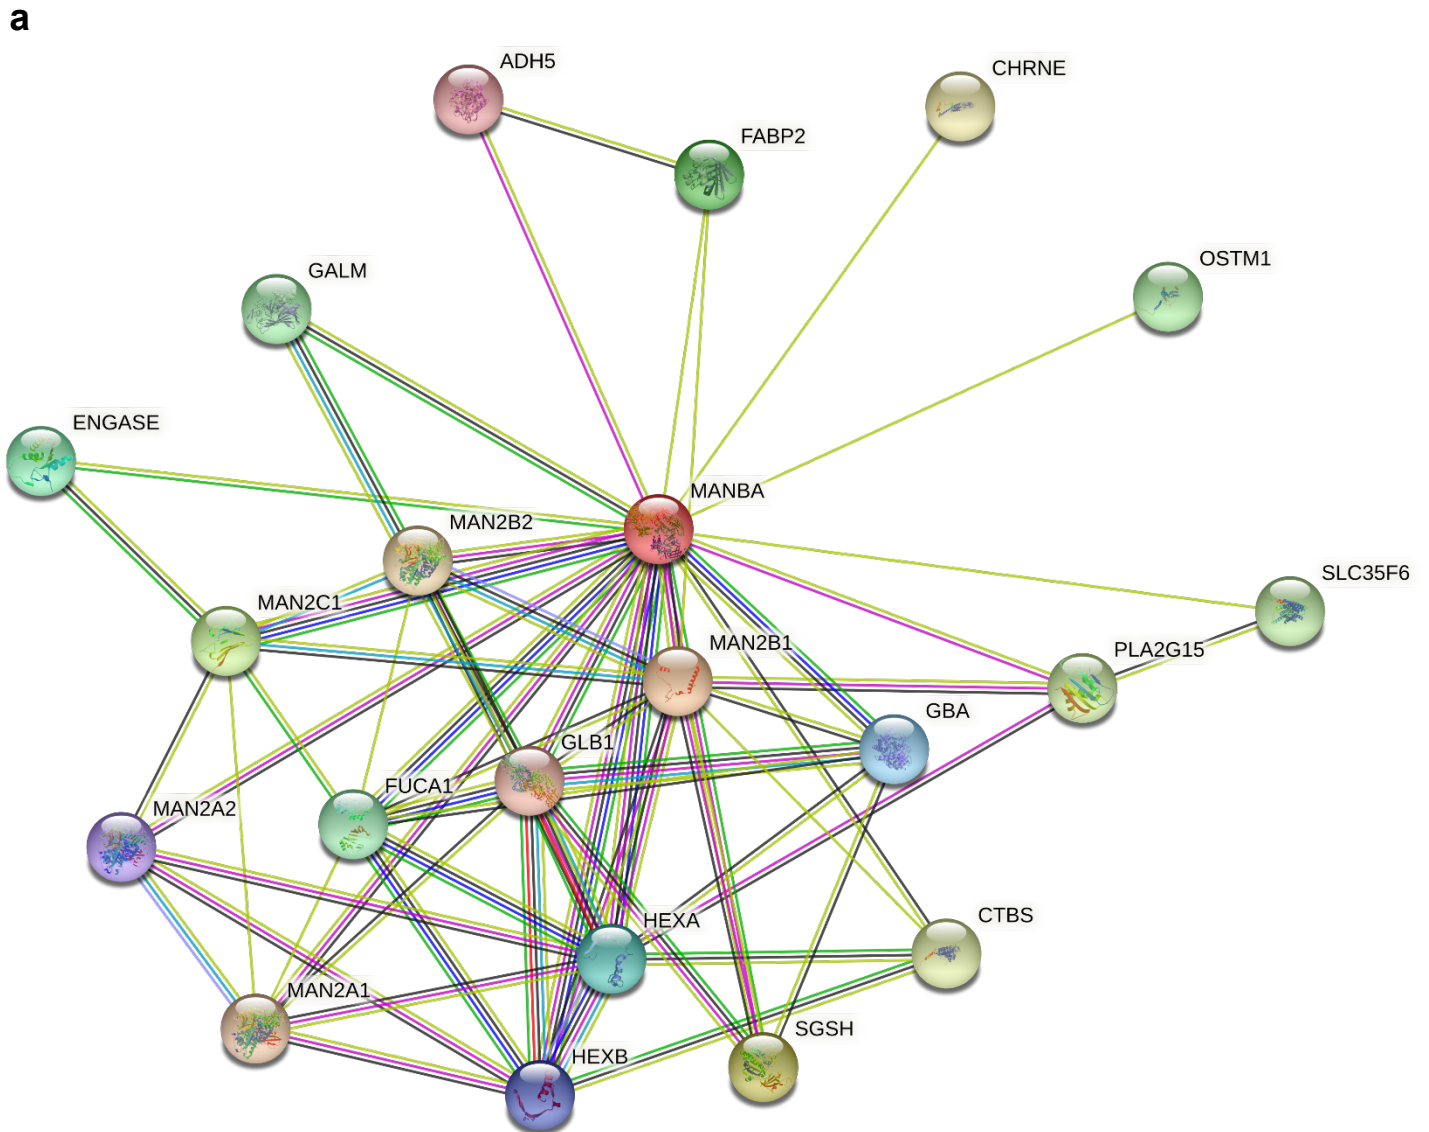

**b**

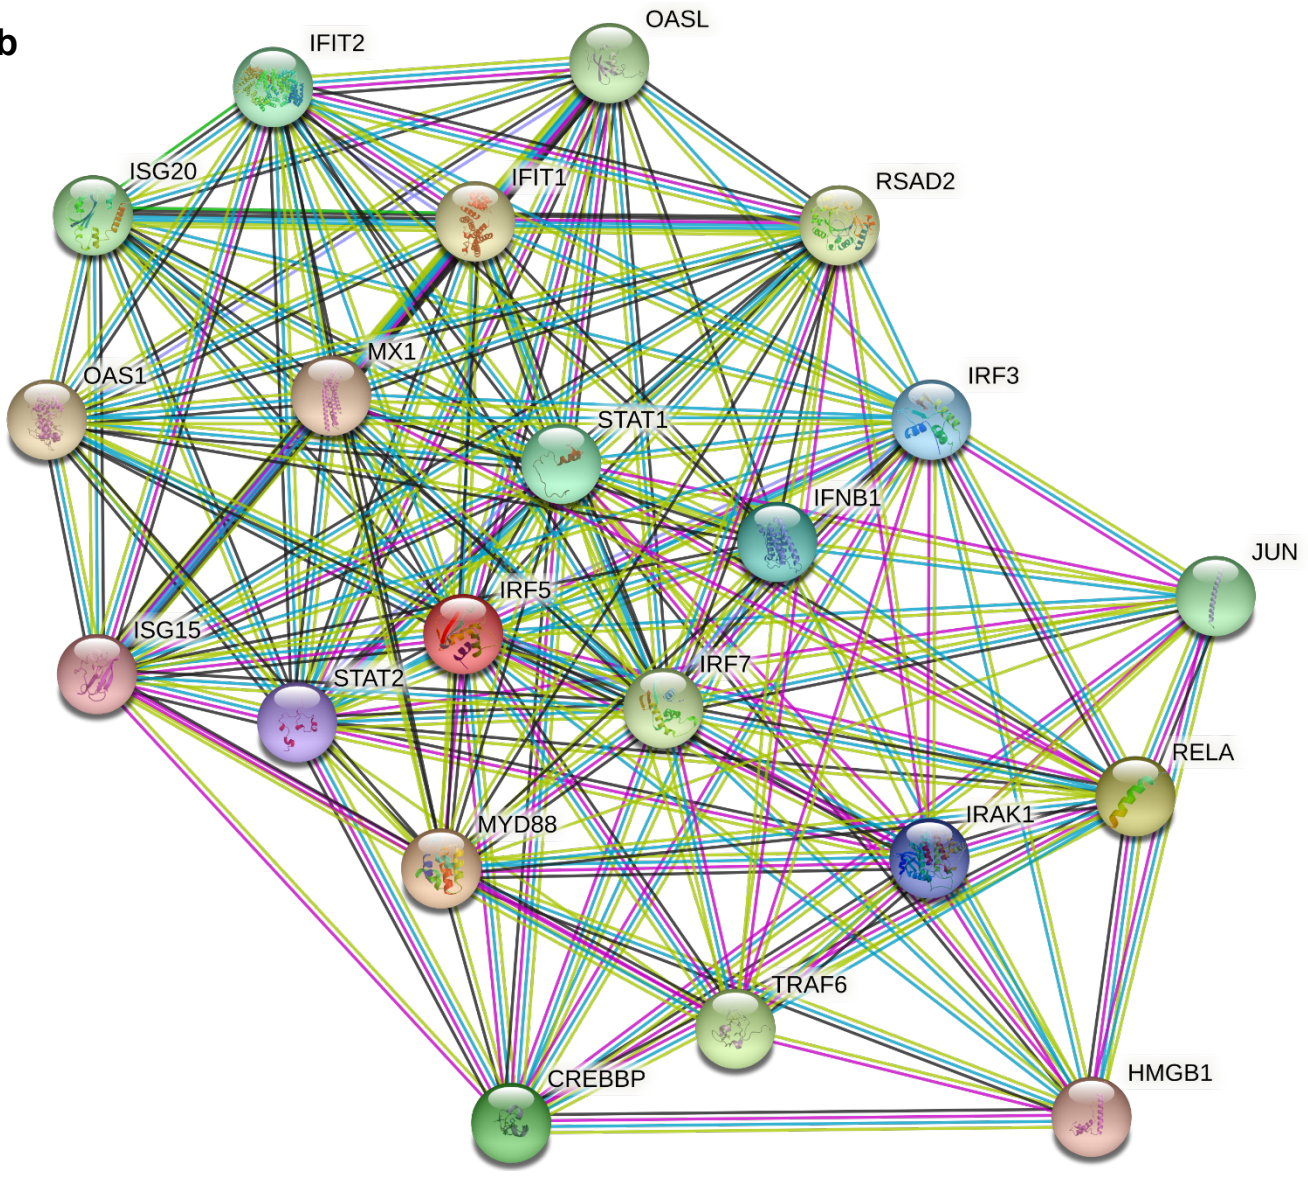

**C**

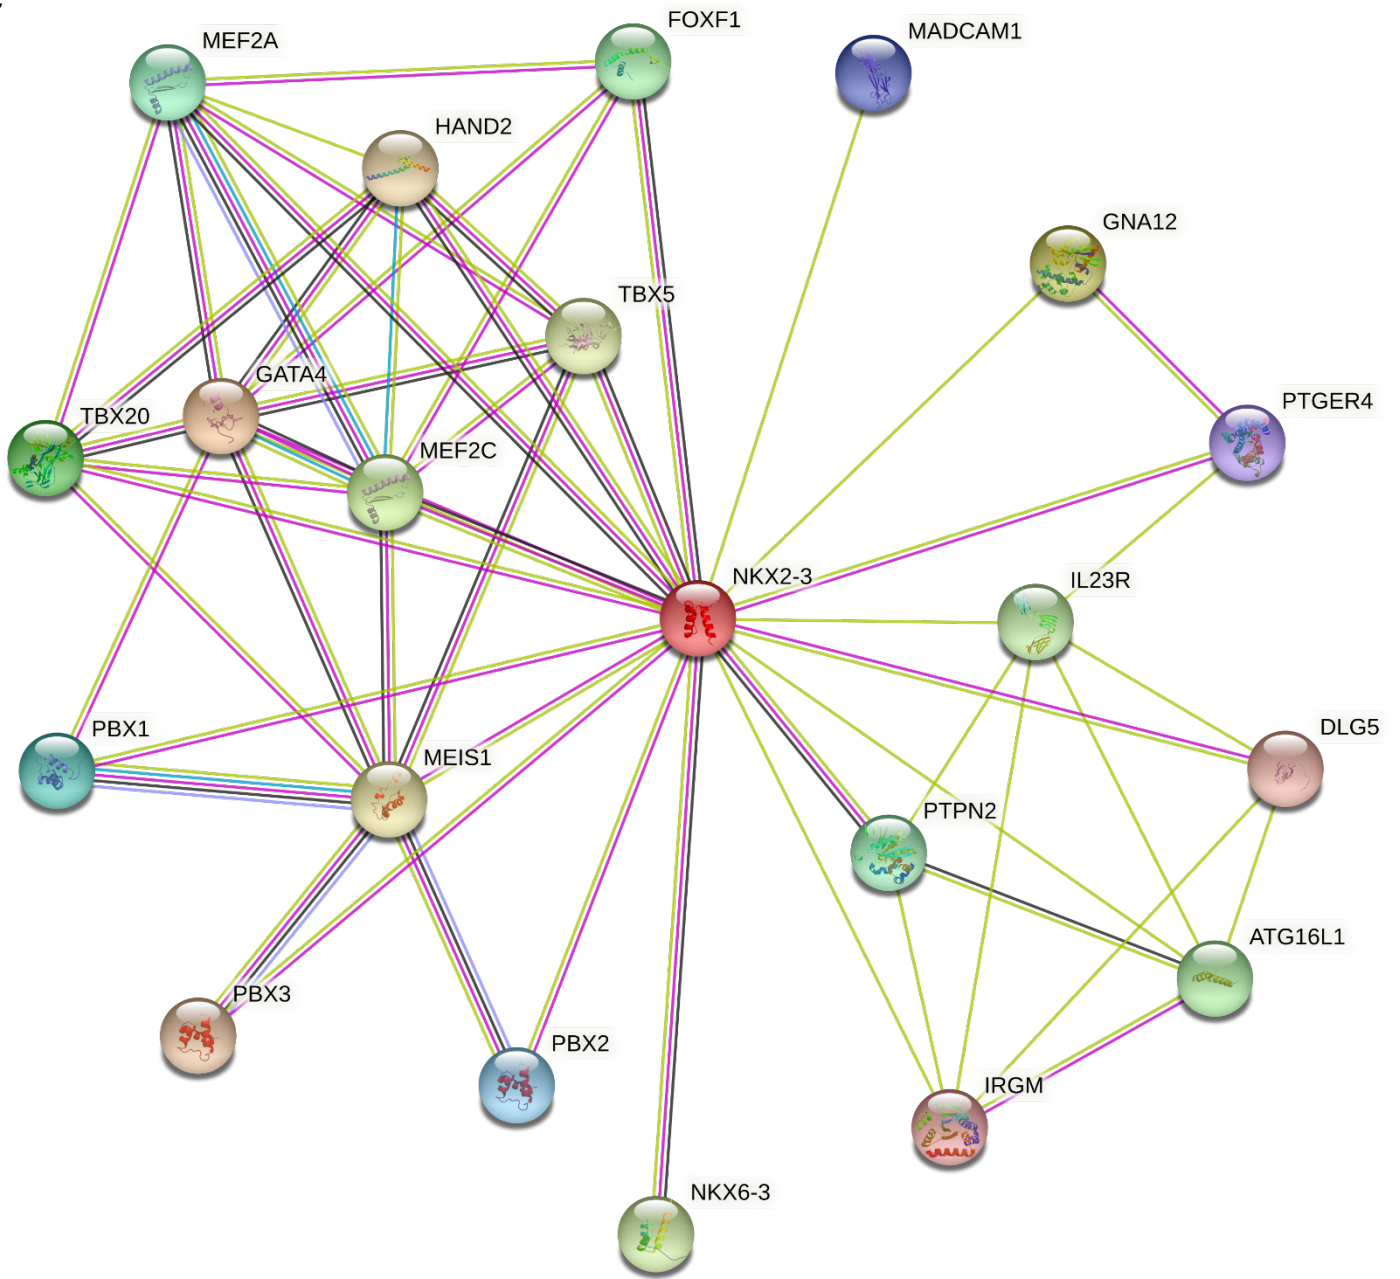

Supplement: 41467_2023_36678_MOESM1_ESM.pdf [file 41467_2023_36678_MOESM1_ESM.pdf]
